# Supplementary material for: Single cell derived mRNA signals across human kidney tumors
Source: PubMed Central journal article supplement (PMC8222373; doi:10.1038/s41467-021-23949-5), 2021-06-23
Supplement: 41467_2021_23949_MOESM1_ESM.pdf [file 41467_2021_23949_MOESM1_ESM.pdf]

## Supplementary Figures

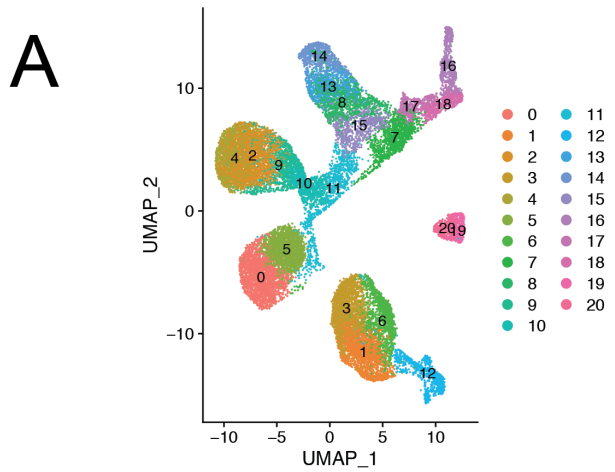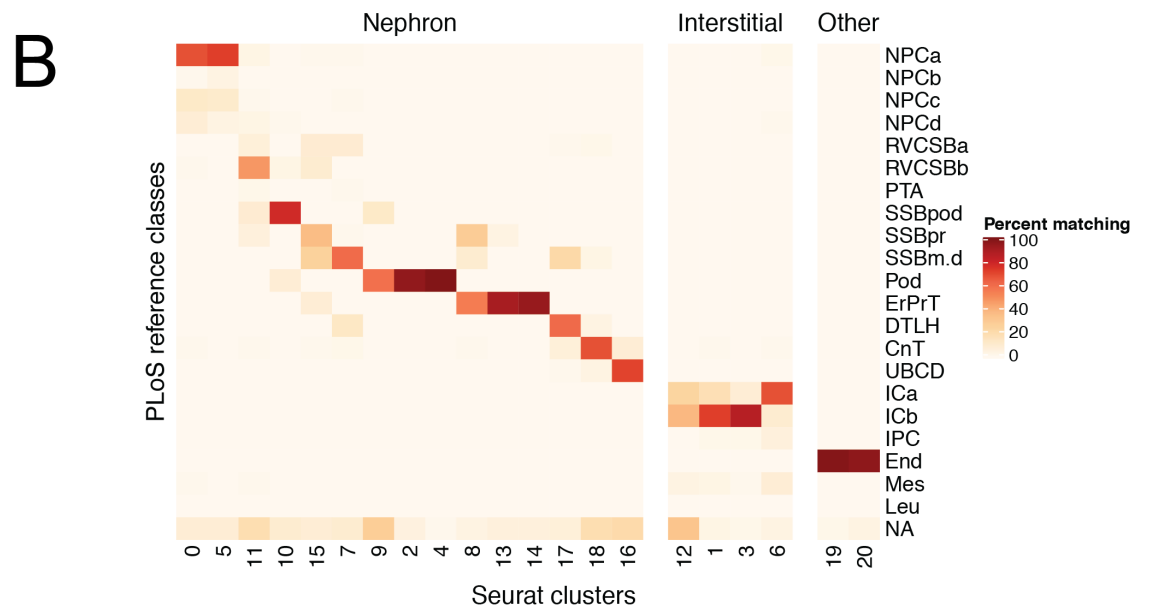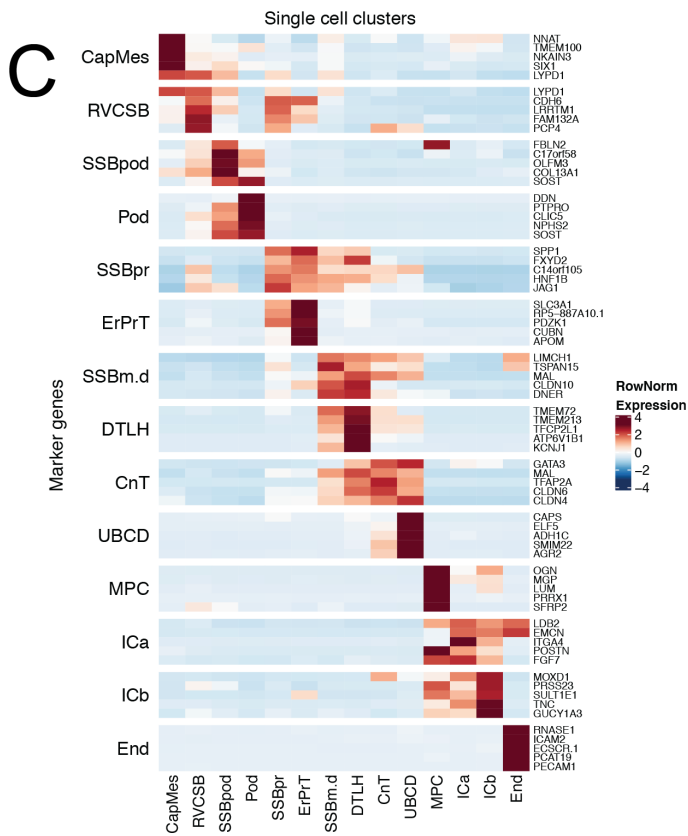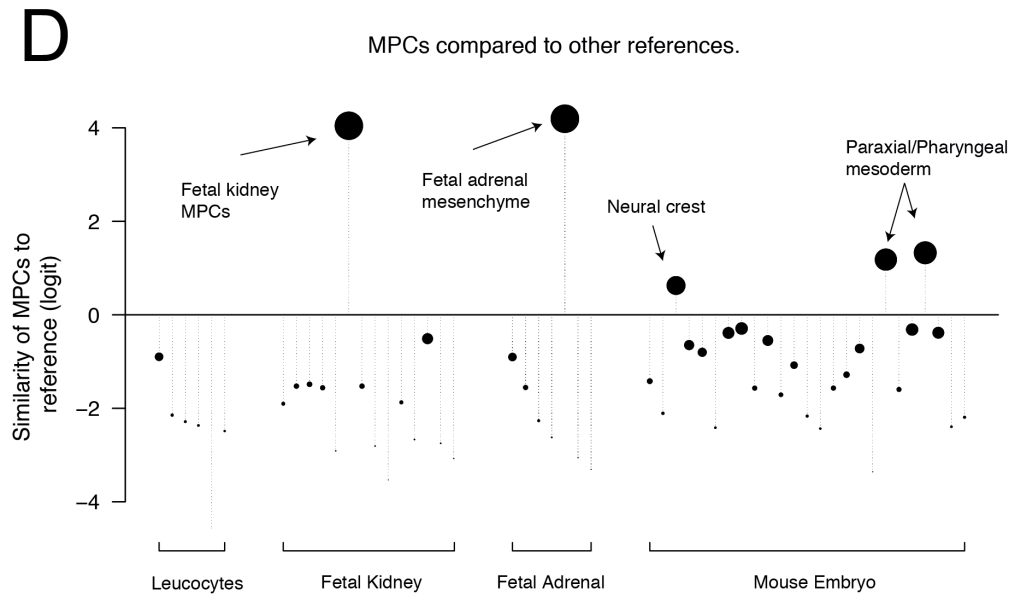

### Supplementary Figure 1 – Fetal kidney reference map

- A. UMAP of fetal kidney clusters** – Reduced dimension representation (UMAP) of the transcriptomes of 21,834 fetal kidney cells where each point represents a cell and nearby cells have similar transcriptomes. Each cell is labelled by a color corresponding to the cluster to which it belongs, as indicated by the legend on the right. Additionally, a label for each cluster is placed at the mean position of cells belonging to each cluster. Clusters are generated as discussed in the methods section.
- B. Comparison of clusters to PLoS annotation** – Each cell is assigned an annotation from<sup>1</sup> based on logistic regression, or NA if the similarity score is less than 1 (logit) or multiple populations have similarity greater than 1. The x-axis shows the clusters from **A**, the y-axis the reference populations and the color scale the fraction of cells assigned to each reference class. Note the high proportion of NAs in cluster 12.
- C. Marker genes defining cell types** – For each annotated cell population in **Fig. 1B**, the top 5 algorithmically determined marker genes are shown. The color scheme indicates the average normalized expression of the cells in the cluster indicated on the x-axis, z-scaled across all cell types to have mean 0 and standard deviation 1.
- D. Similarity of MPCs to other tissues** – Similarity score (logits) calculated by logistic regression trained on the fetal kidney reference to MPCs. Note that the extremely high similarity to the equivalent population in the fetal adrenal.

Source data are available as a Source Data file.

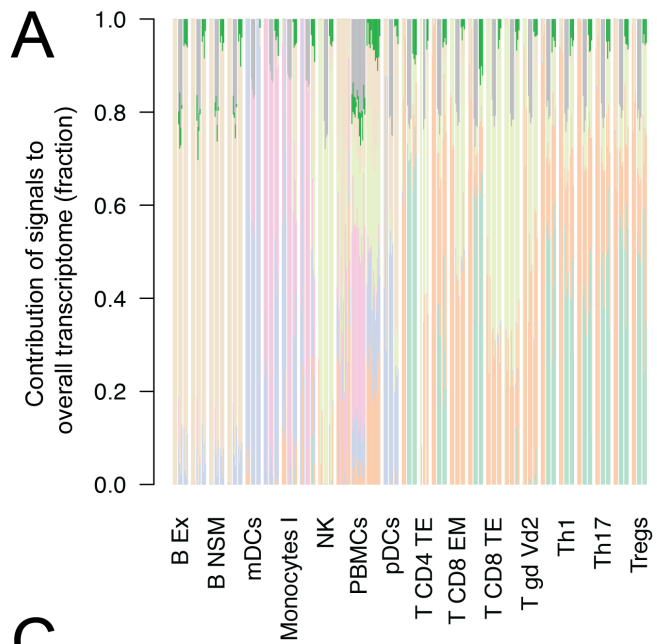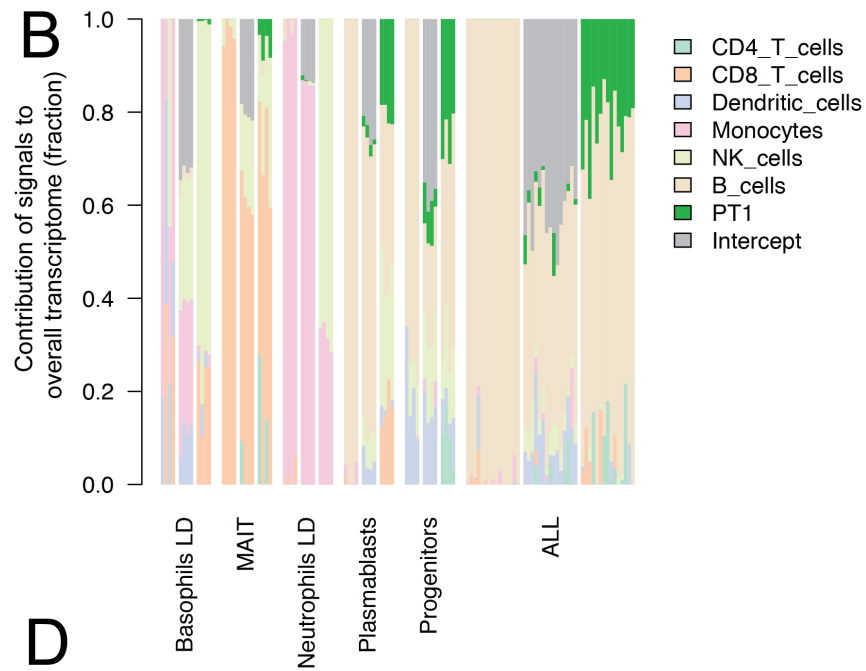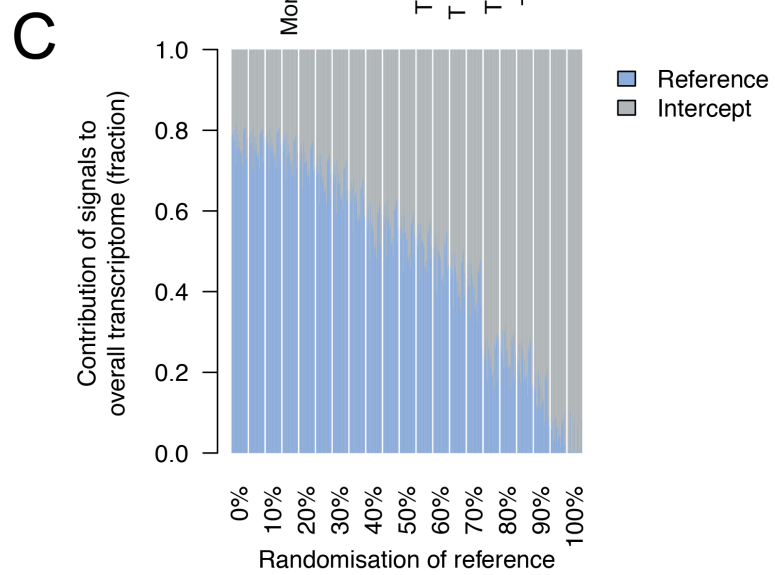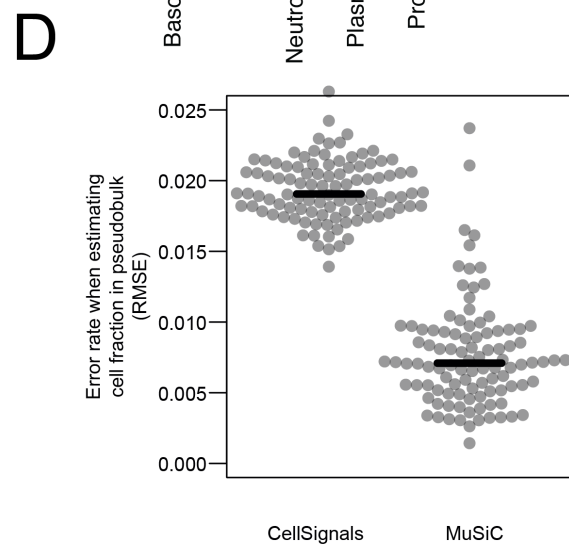

## Supplementary Figure 2 – Benchmarking of cellular signal analysis

- A. Benchmarking using bulk transcriptomes with match in reference** – The same comparison as in **Fig. 1D** but where each reference cell signal is shown individually rather than grouped into “matching” and “non-matching”. Each bar represents a bulk transcriptome, with the different colors indicating the relative contribution from each reference cell signal (see legend). Transcriptomes are grouped into blocks of the same type as shown on the x-axis and within each block the results of deconvolution using BSeq-SC, cellular signal analysis, and MuSiC are shown in separate blocks from left to right.
- B. Benchmarking using bulk transcriptomes with no match in reference** – The same comparison as in **Fig. 1E** but where each reference cell signal is shown individually rather than grouped into “matching” and “non-matching”. Each bar represents a bulk transcriptome, with the different colors indicating the relative contribution from each reference cell signal (see legend). Transcriptomes are grouped into blocks of the same type as shown on the x-axis and within each block the results of deconvolution using BSeq-SC, cellular signal analysis, and MuSiC are shown in separate blocks from left to right.
- C. Response of unexplained signal (Intercept) to incomplete reference** – Bulk transcriptomes from flow sorted B cells are fit using cellular signal analysis using a reference consisting of a B cell signal only. This reference is then progressively randomized to decrease its suitability for the bulk B cell transcriptomes as indicated by the label on the x-axis. In each case, the resulting fraction of the signal that is allocated to either the modified reference, or the intercept term (the “unexplained signal”) is shown by the size of the colored bars.
- D. Recovering composition of bulk tissue from bulk transcriptomes** – Using the same single cell PBMC data used as a reference in panels A and B, 100 pseudobulk transcriptomes were generated by random sampling. These pseudobulk transcriptomes were then deconvoluted with both cell signal analysis and MuSiC using the same single cell data as a reference. Finally, the abundance of cell types in each pseudobulk transcriptome was estimated and compared to the true proportions to calculate the root mean squared error (RMSE) for each sample. The RMSE values for all 100 simulations are shown on the y-axis, and the deconvolution method is shown on the x-axis. The black line indicates the median RMSE for each method.

Source data are available as a Source Data file.

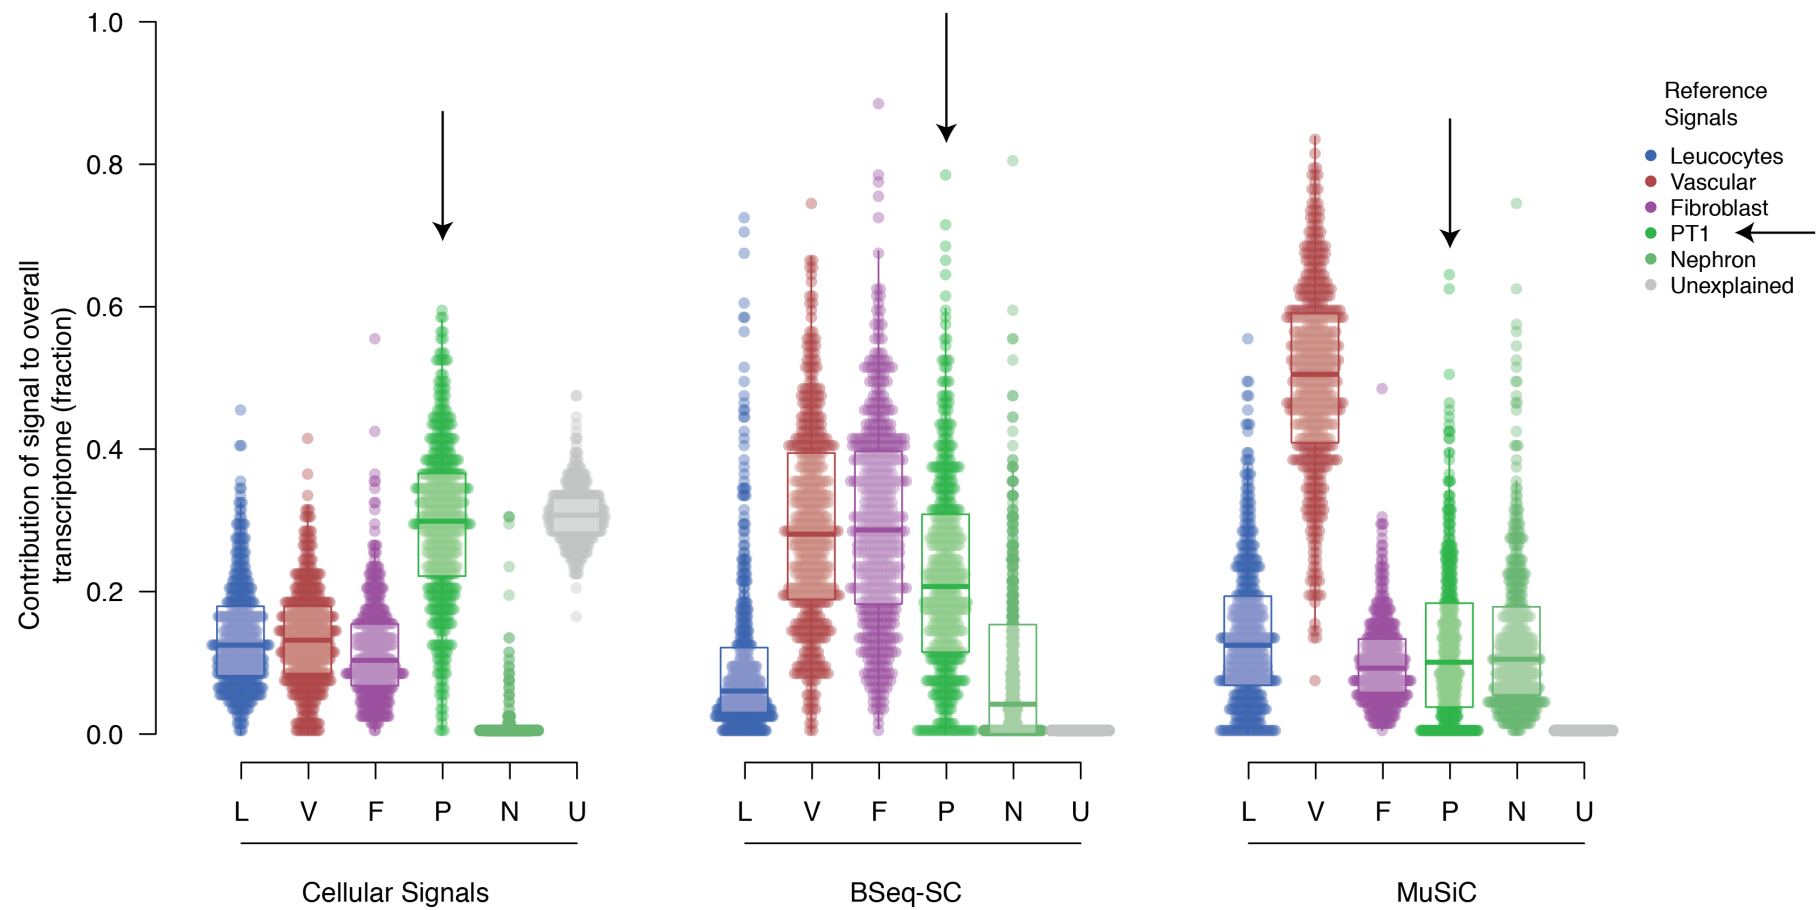

### **Supplementary Figure 3 – Ability of different methods to recover known RCC signal**

We applied our cellular signal method, BSEQ-sc and MuSiC to a population of clear cell and papillary cell renal cell carcinomas, using reference signals derived from the mature normal kidney. This population of tumors is known to resemble the PT1 population of proximal tubular cells and have a strong vascular component. The relative contribution of each signal to each bulk RNA-seq sample is shown by the y-axis. The results for the three methods are split into blocks, with cellular signals on the left, BSEQ-sc in the middle, and MuSiC on the right. Each signal type is labelled with an abbreviation and colored as shown by the legend on the right. Signals are marked with a square for fetal kidney and circle for mature kidney. For our method, there is an additional signal which represents the unexplained signal for each sample (see Methods). Contributions due to vascular signals, fibroblast signals, leucocyte signals, and all non-proximal tubular nephron signals are aggregated together. Each signal/sample combination is represented by a single point and the distribution of relative signal contributions to the bulk transcriptomes are summarized with boxplots. Arrows mark the PT1 population which these tumors are known to resemble. Boxplots show the distribution median (middle line), 1<sup>st</sup> and 3<sup>rd</sup> quartiles (box limits), and 1.5 times the inter-quartile range beyond the box-limits (whiskers).

Source data are available as a Source Data file.

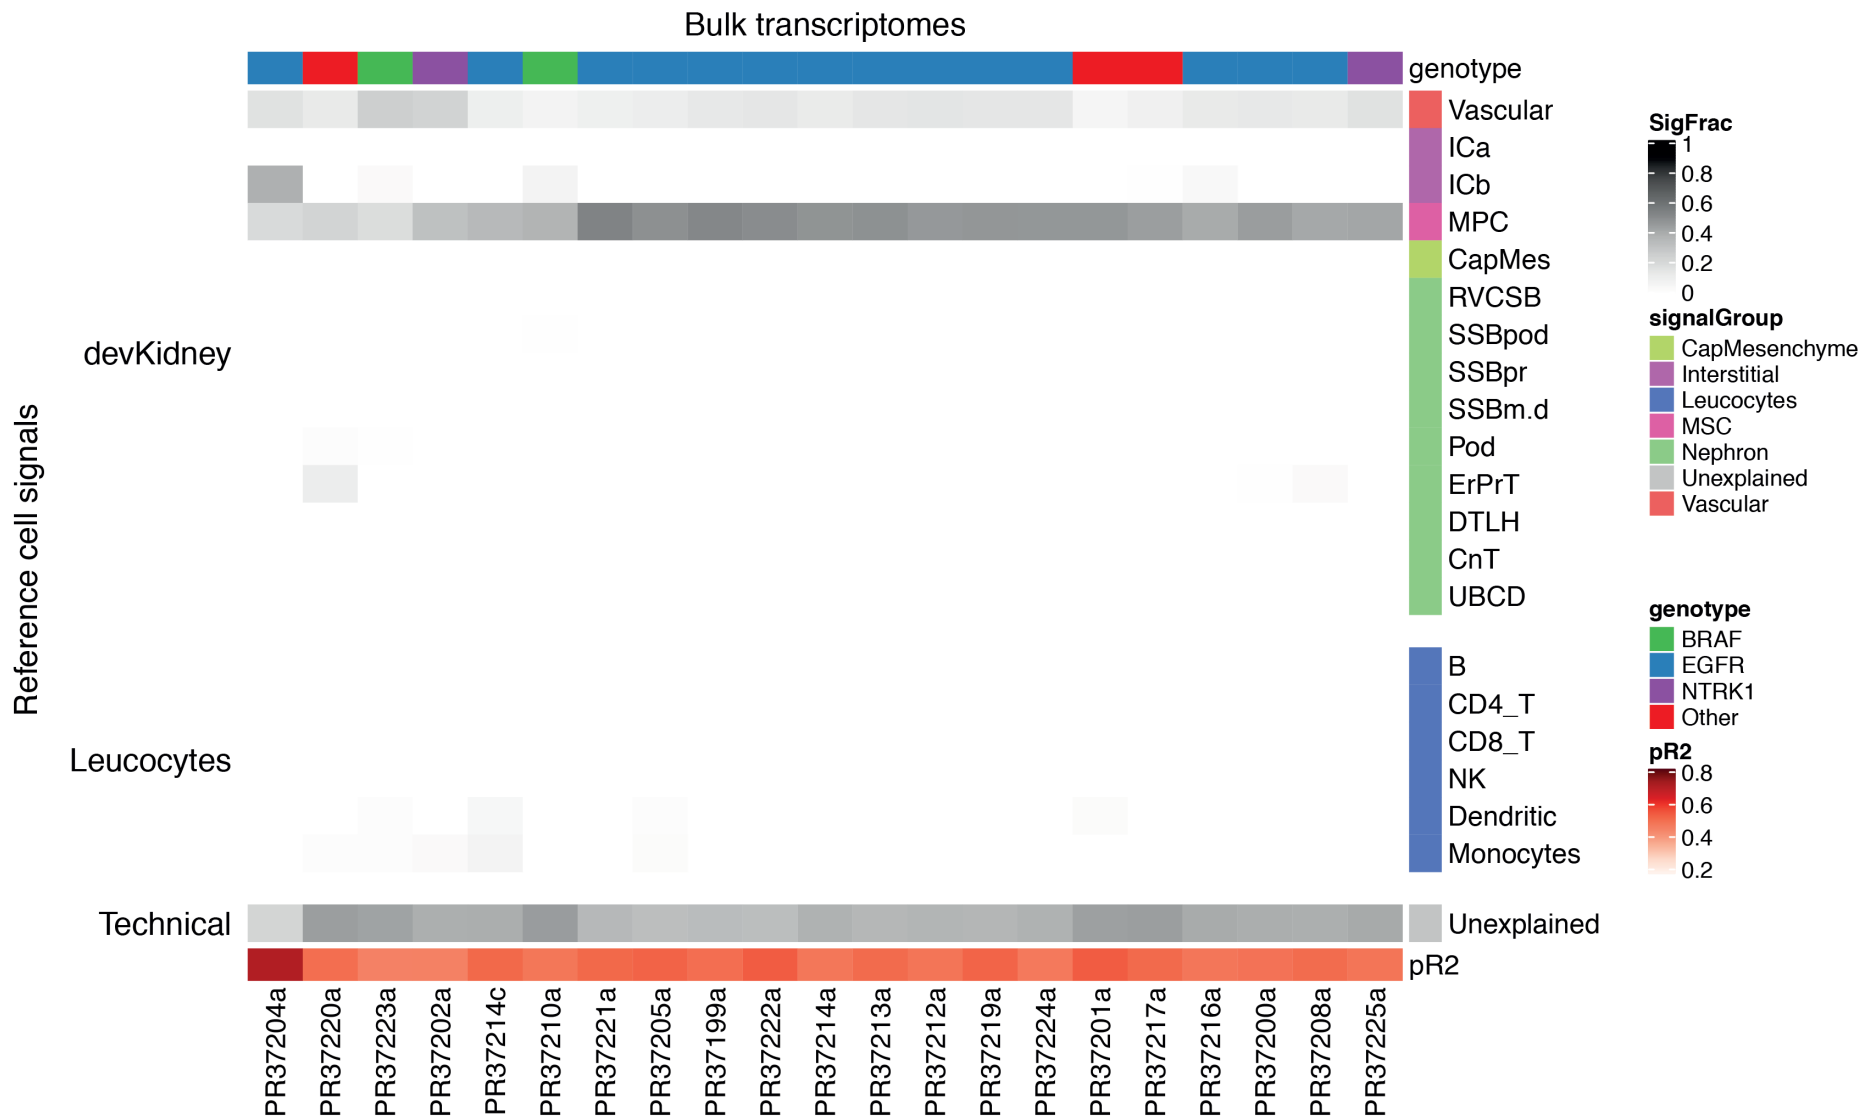



#### **Supplementary Figure 4 – CMNs resembles interstitial cells**

The same data as in **Fig. 3A**, but presented in heatmap form. Each column represents a sample and each row a collection of reference signal. The shading in each cell represents the relative contribution of that collection of reference signals to explaining the bulk transcriptome of that sample. The CMN samples are then further sub-divided by genotype. Sample IDs are printed below each column. The pR2 column represents a pseudo-R squared value for each sample, calculated as 1 minus the ratio of the log likelihoods of the full model to a model consisting of only the intercept term.

Source data are available as a Source Data file.

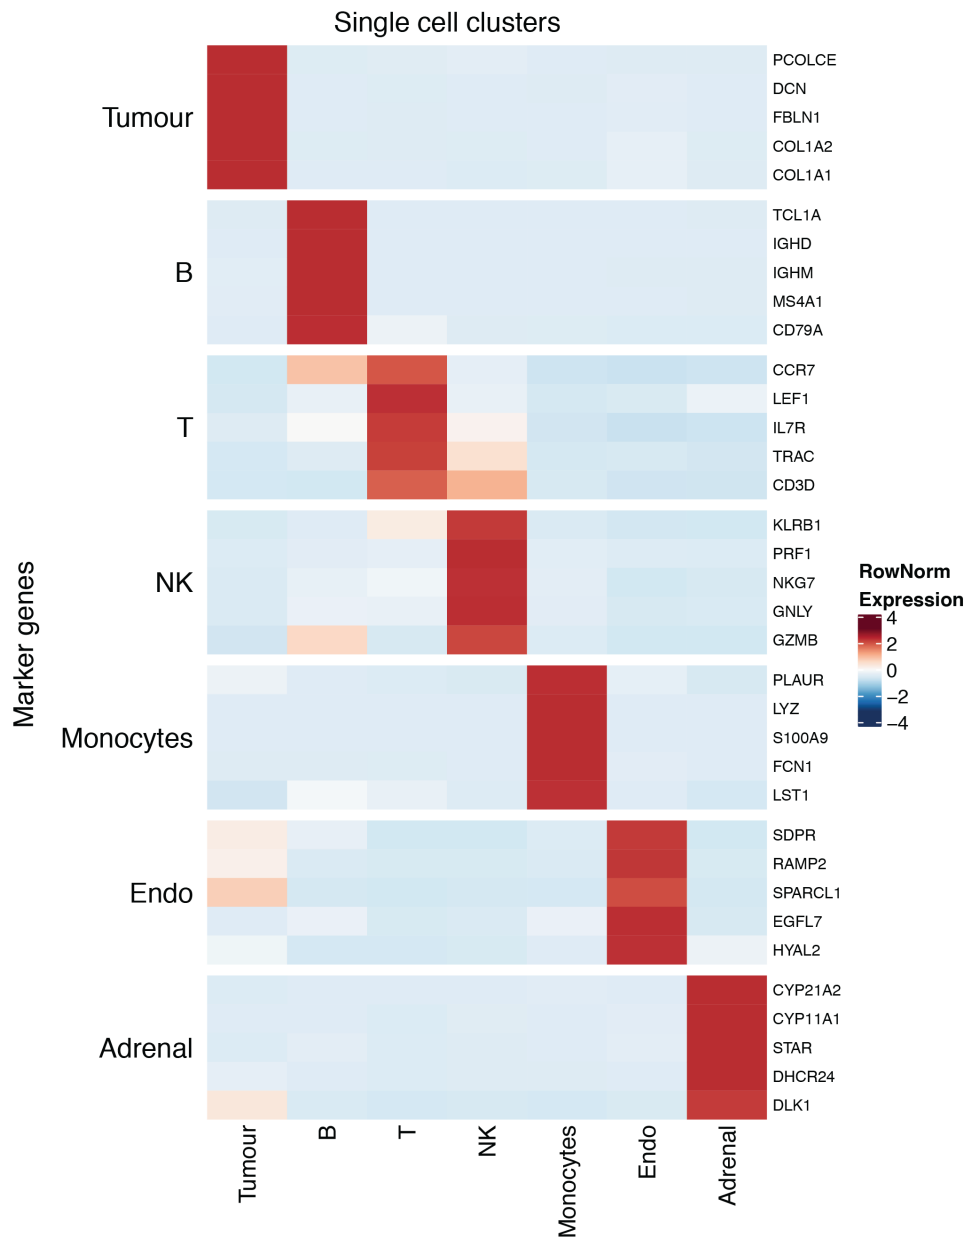

**Supplementary Figure 5 – Key markers of cell types of CMN** For each annotated cell population in **Fig. 3D**, the top 5 algorithmically determined marker genes are shown. The color scheme indicates the average normalized expression of the cells in the cluster indicated on the x-axis, z-scaled across all cell types to have mean 0 and standard deviation 1. Source data are available as a Source Data file.

# Bulk Transcriptomes

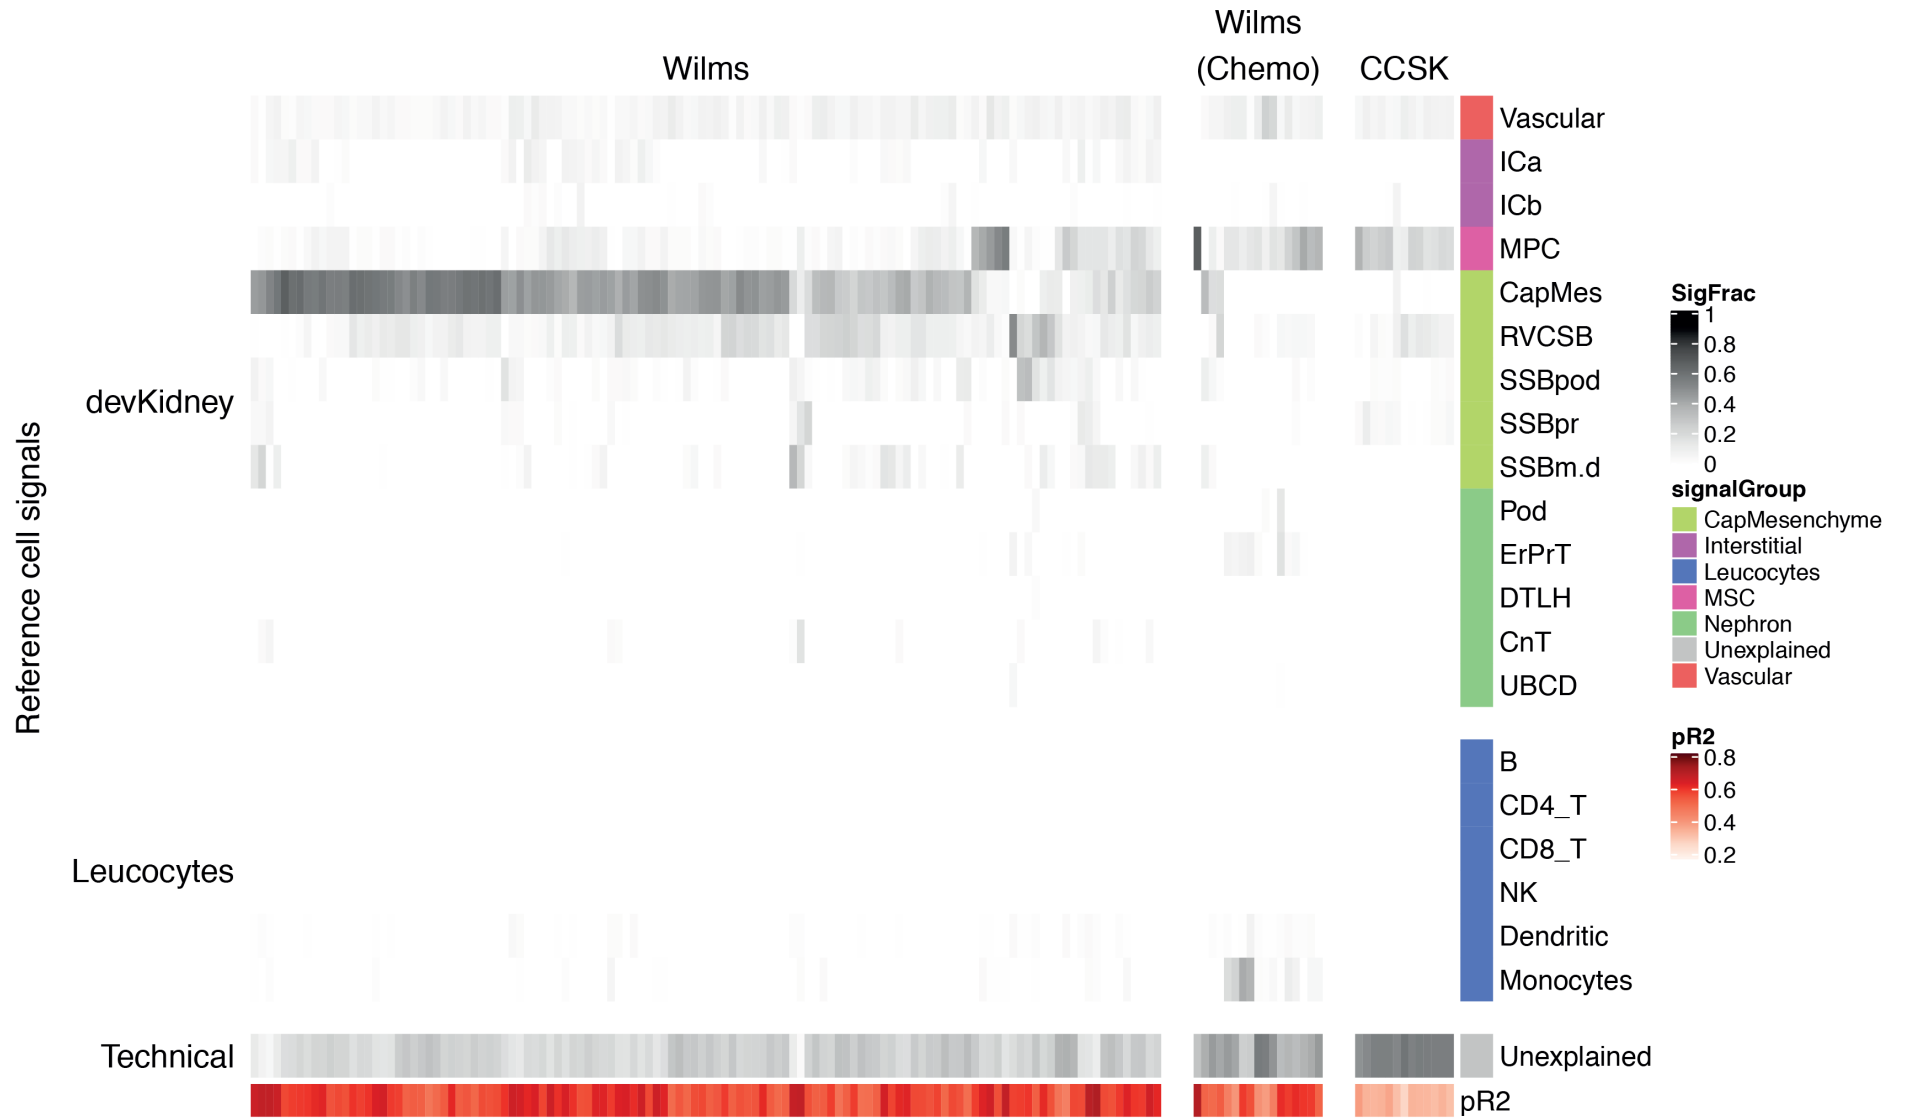

**Supplementary Figure 6 – Wilms/Nephroblastoma and CCSK fit using fetal kidney signals**

The same data as in **Fig. 4A**, but presented in heatmap form. Each column represents a sample and each row a collection of reference signal. The shading in each cell represents the relative contribution of that collection of reference signals to explaining the bulk transcriptome of that sample. The pR2 column represents a pseudo-R squared value for each sample, calculated as 1 minus the ratio of the log likelihoods of the full model to a model consisting of only the intercept term.

Source data are available as a Source Data file.

**A**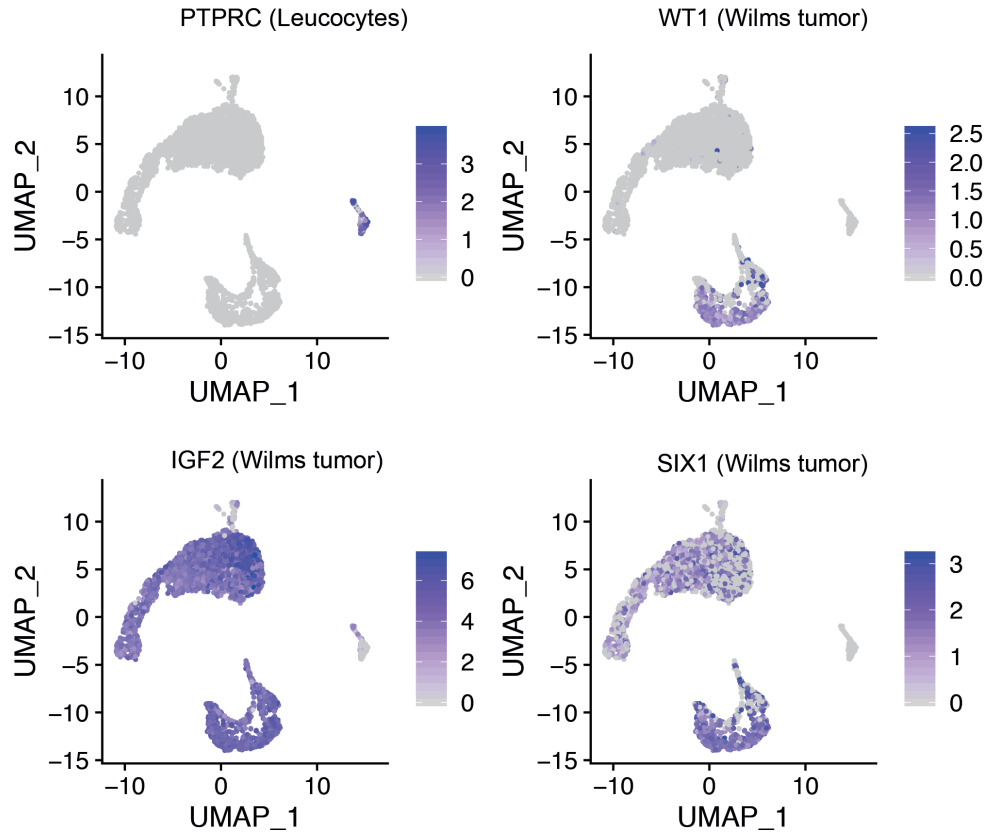**B**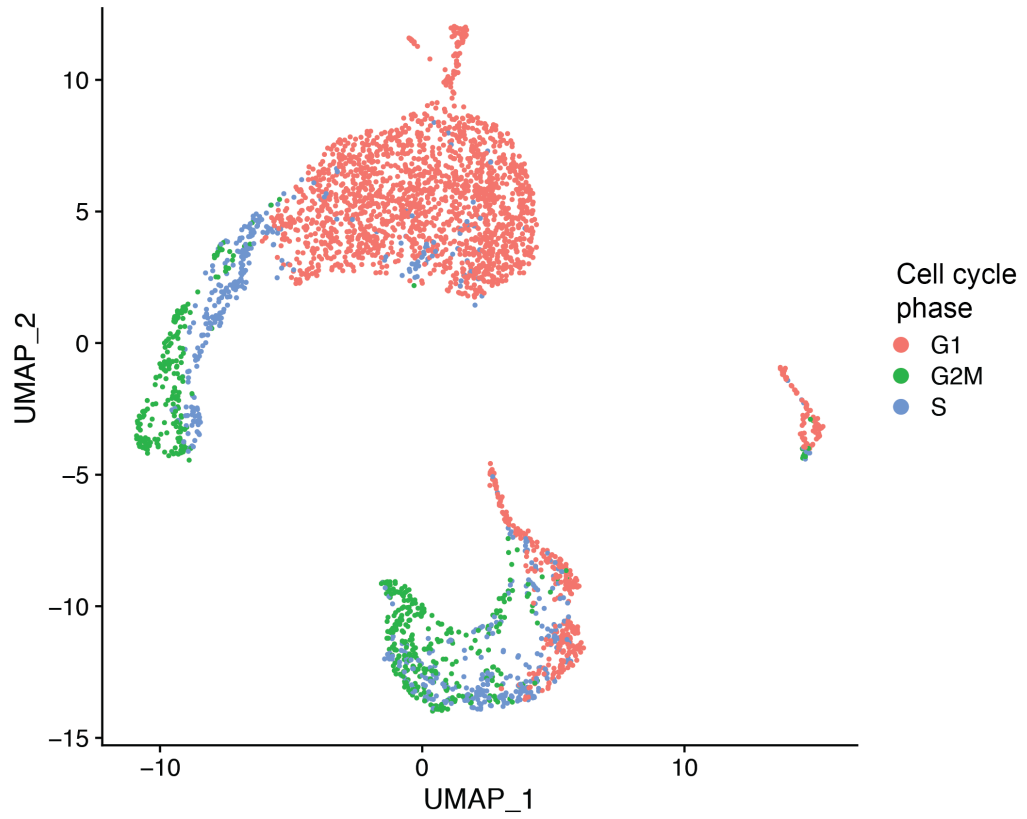

### **Supplementary Figure 7 – Annotation of single cell Wilms data**

**A. Expression of key markers** – Reduced dimension representation (UMAP) of the transcriptomes of Wilms cells, colored by log-normalized expression of the gene in the panel title. The cell type that a gene is a marker of is shown in brackets.

**B. Phase of cell cycle** – The same data as panel **A**, but colored by inferred cell cycle phase as indicated by the legend on the right.

Source data are available as a Source Data file.

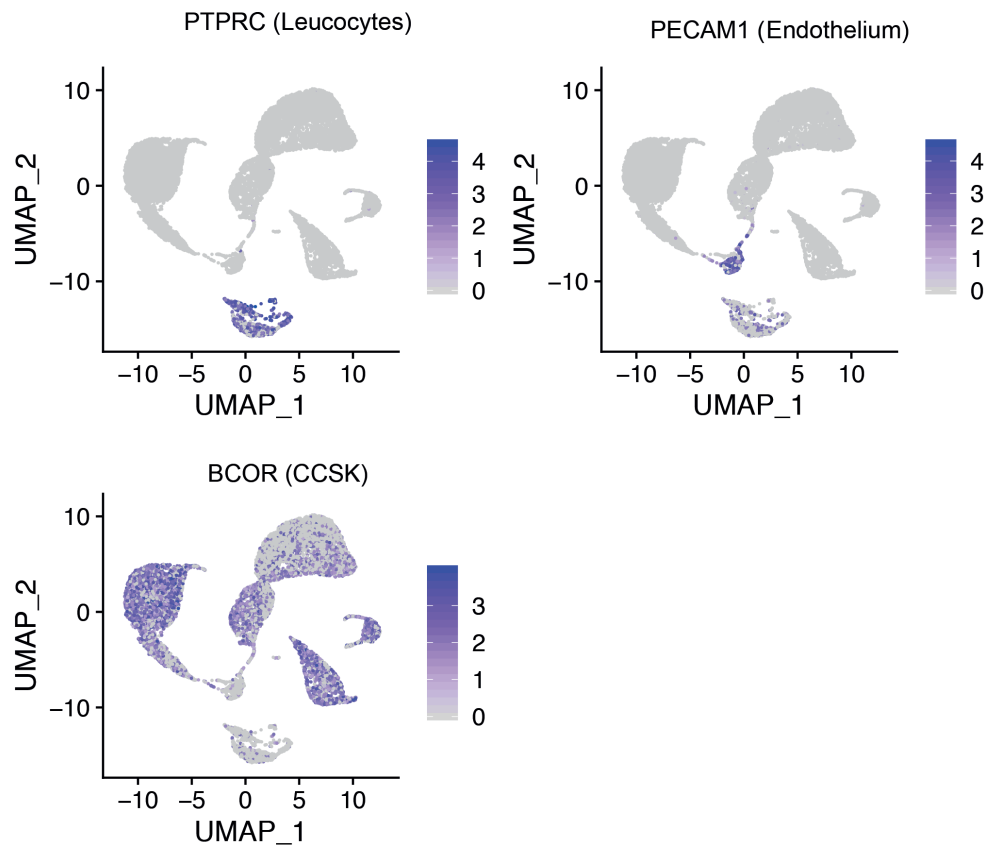

**Supplementary Figure 8 – Annotation of single cell CCSK data**

Reduced dimension representation (UMAP) of the transcriptomes of CCSK cells, colored by log-normalized expression of the gene in the panel title. The cell type that a gene is a marker of is shown in brackets.

Source data are available as a Source Data file.

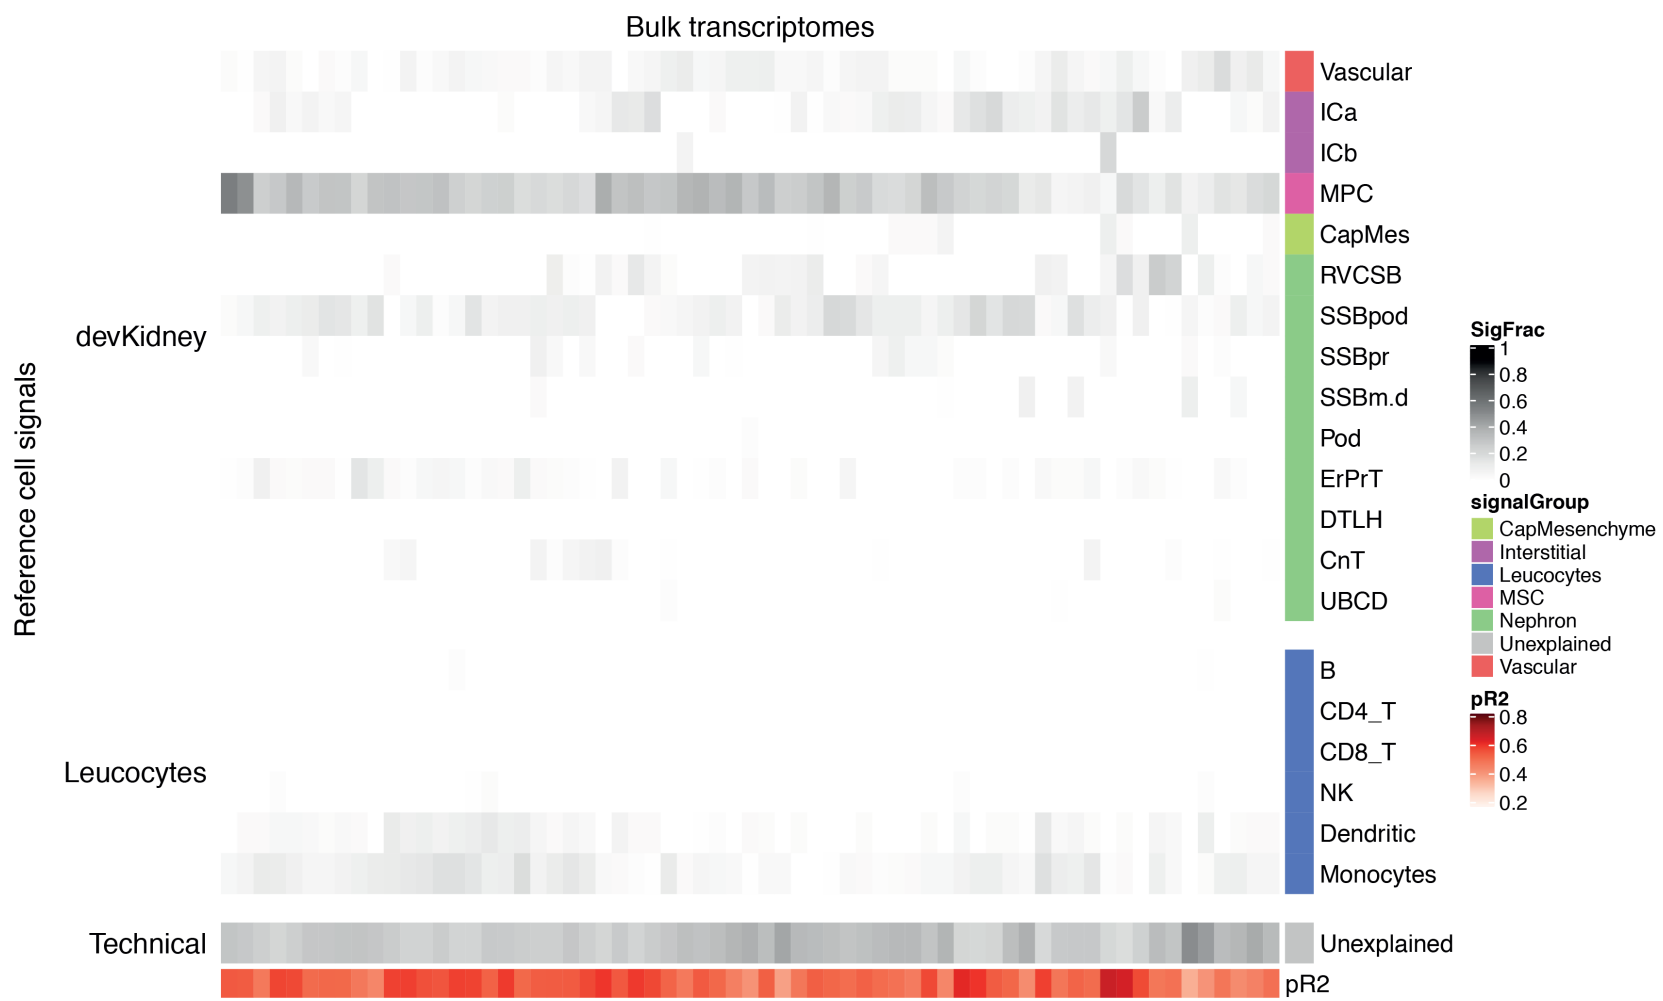



**Supplementary Figure 9 – MRTs fit using fetal kidney signals**

The same data as in **Fig. 5A**, but presented in heatmap form. Each column represents a sample and each row a collection of reference signal. The shading in each cell represents the relative contribution of that collection of reference signals to explaining the bulk transcriptome of that sample. The pR2 column represents a pseudo-R squared value for each sample, calculated as 1 minus the ratio of the log likelihoods of the full model to a model consisting of only the intercept term. Source data are available as a Source Data file.

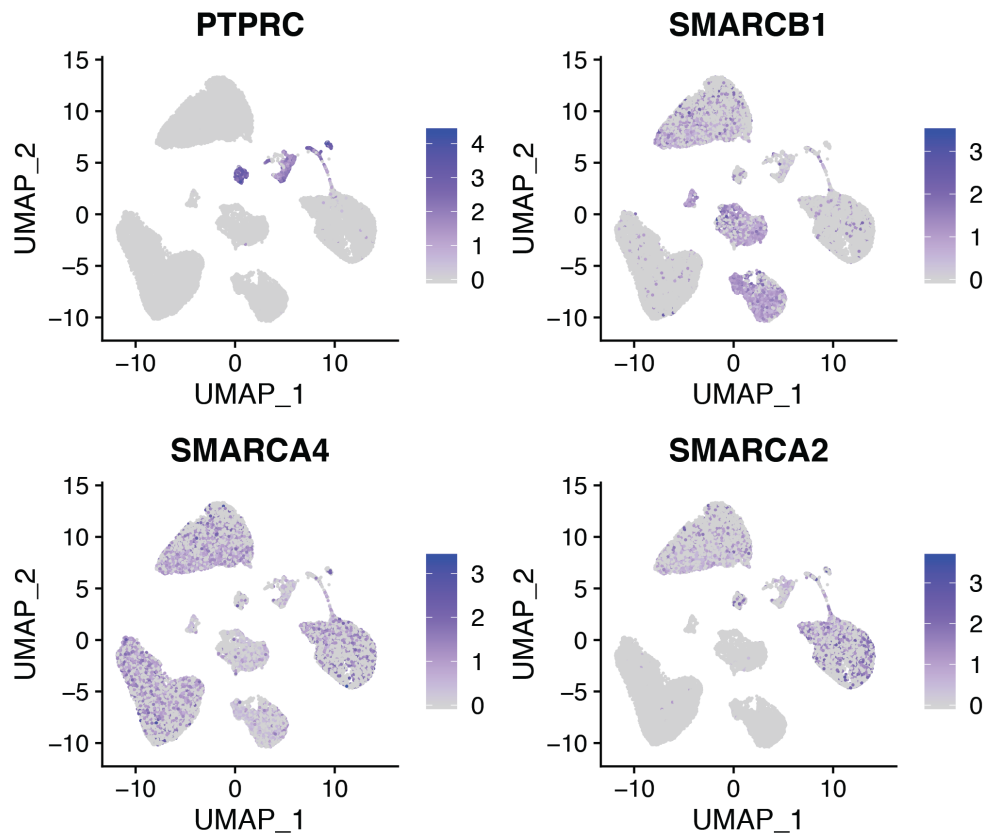

**Supplementary Figure 10 - Annotation of single cell MRT data**

Reduced dimension representation (UMAP) of the transcriptomes of MRT cells, colored by log-normalized expression of the gene in the panel title.

Source data are available as a Source Data file.

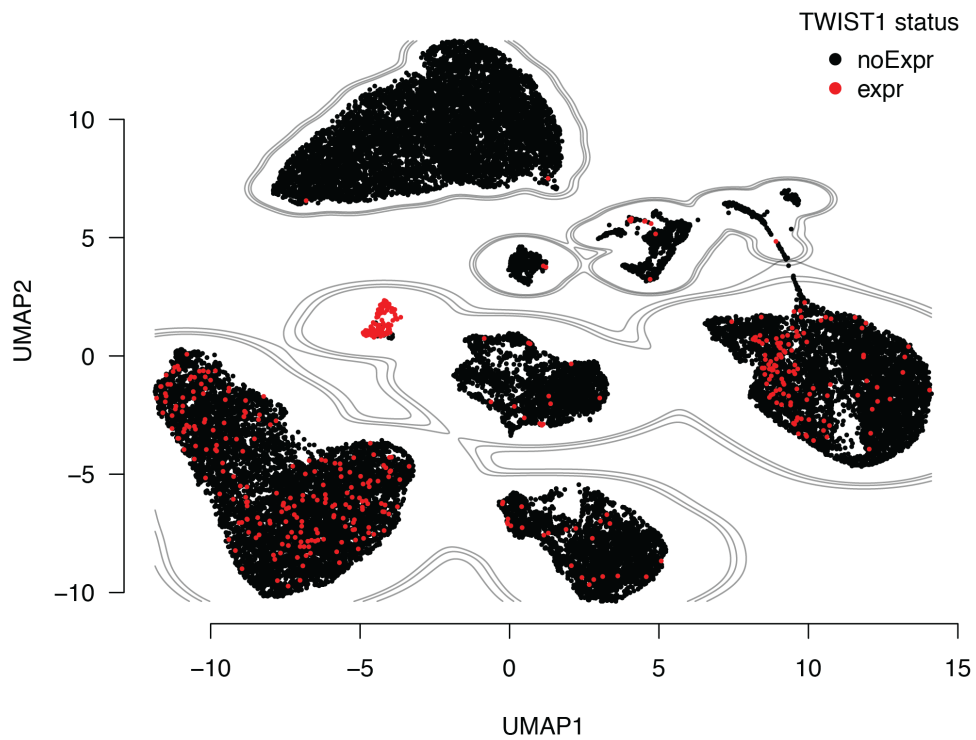

**Supplementary Figure 11 – TWIST1 positive cells in MRT**

Reduced dimension representation (UMAP) of the transcriptomes of MRT cells (as in **Fig. 5B**), with cells with any expression of *TWIST1* colored red and those without colored black. Source data are available as a Source Data file.

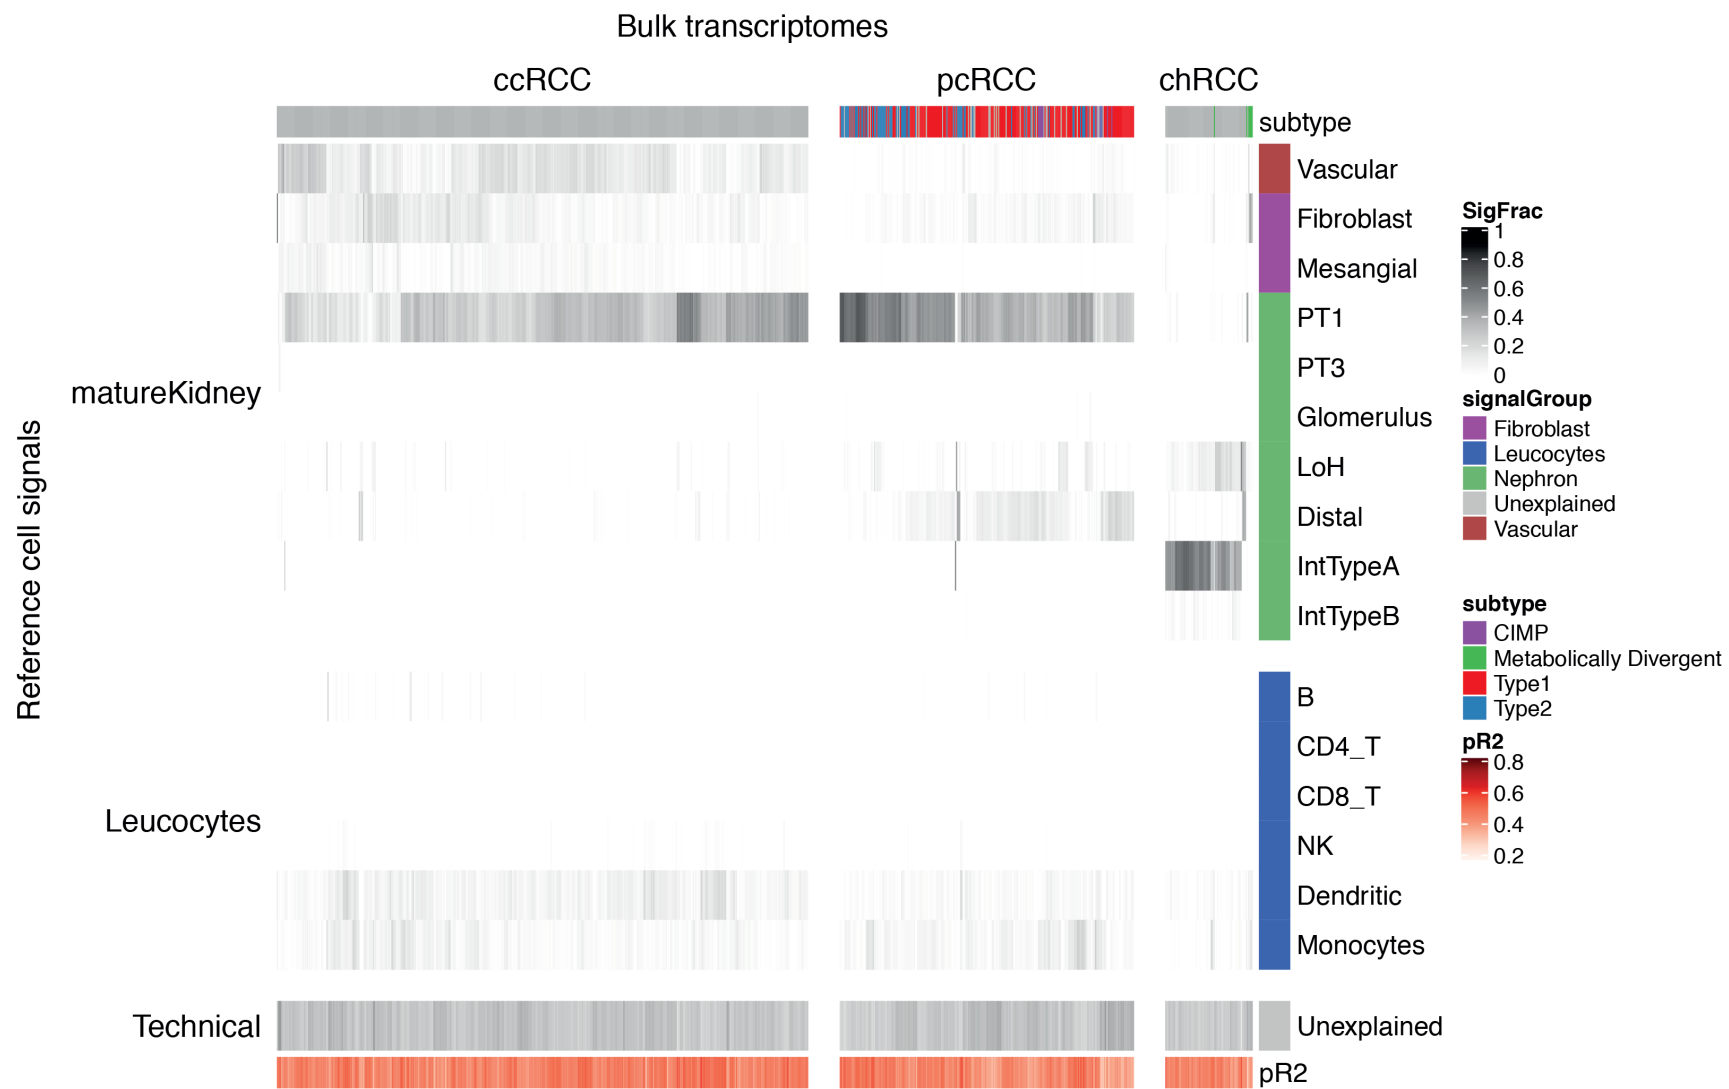

**Supplementary Figure 12 – All RCCs fit using mature kidney signals**

The same data as in **Fig. 6A**, but presented in heatmap form. Each column represents a sample and each row a collection of reference signal. Subtypes of tumor are indicated by the annotation row at the top of the figure. The shading in each cell represents the relative contribution of that collection of reference signals to explaining the bulk transcriptome of that sample. The pR2 column represents a pseudo-R squared value for each sample, calculated as 1 minus the ratio of the log likelihoods of the full model to a model consisting of only the intercept term. Source data are available as a Source Data file.

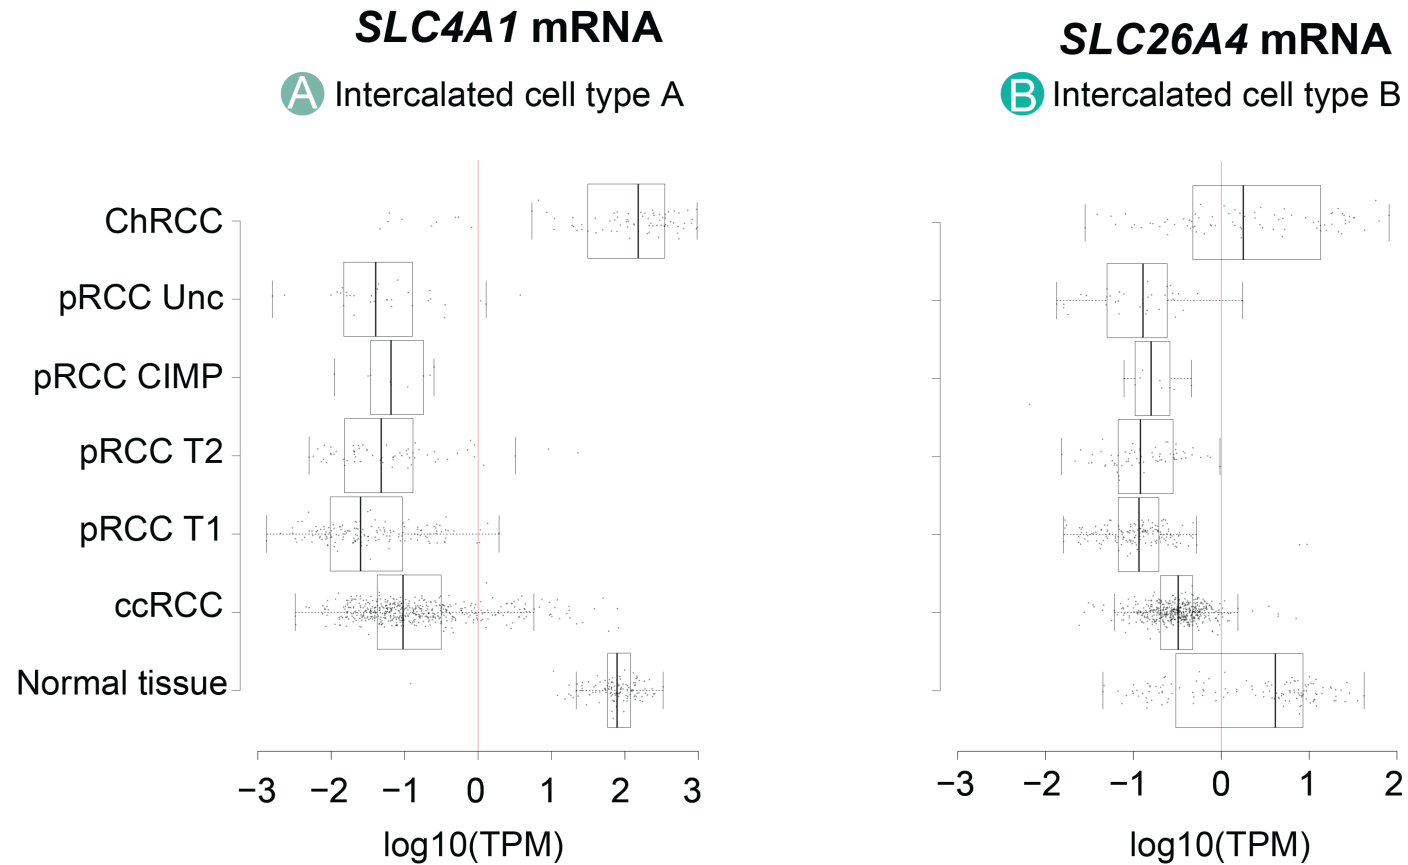

**Supplementary Figure 13 - Expression of markers of Type A and B intercalated cells in bulk transcriptomes**

Boxplots showing expression of canonical markers of Type A (left) and B (right) intercalated cells in different populations of bulk kidney tumor and normal transcriptomes. Expression values are normalized to transcripts per million (TPM) and log<sub>10</sub> transformed and shown on the x-axis, with each point representing a sample and a boxplot showing the distribution of expression values for that sample type. A red line marks 0 on the log transformed expression scale. Boxplots show the distribution median (middle line), 1<sup>st</sup> and 3<sup>rd</sup> quartiles (box limits), and 1.5 times the inter-quartile range beyond the box-limits (whiskers).

Source data are available as a Source Data file.

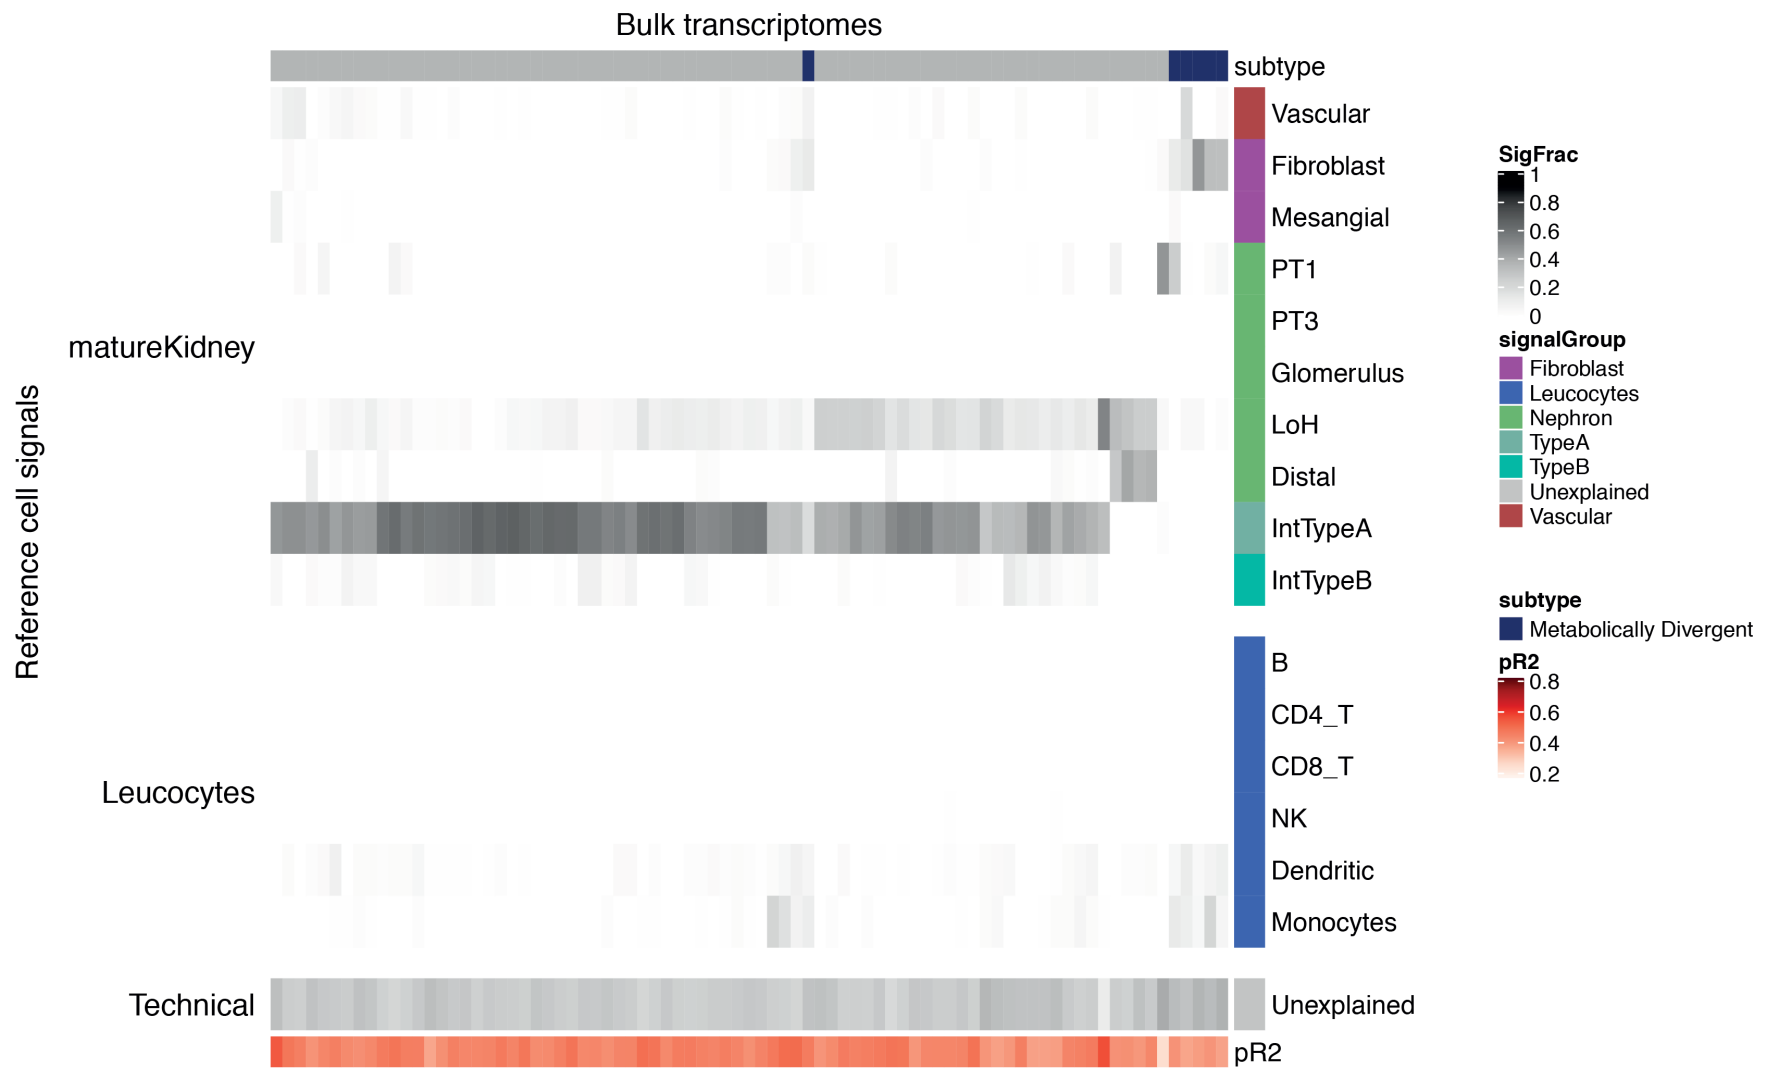

**Supplementary Figure 14 – ChRCC fit using mature kidney signals**

The same data as in **Fig. 6E**, but presented in heatmap form. Each column represents a sample and each row a collection of reference signal. Subtypes of tumor are indicated by the annotation row at the top of the figure. The shading in each cell represents the relative contribution of that collection of reference signals to explaining the bulk transcriptome of that sample. The pR2 column represents a pseudo-R squared value for each sample, calculated as 1 minus the ratio of the log likelihoods of the full model to a model consisting of only the intercept term. Source data are available as a Source Data file.



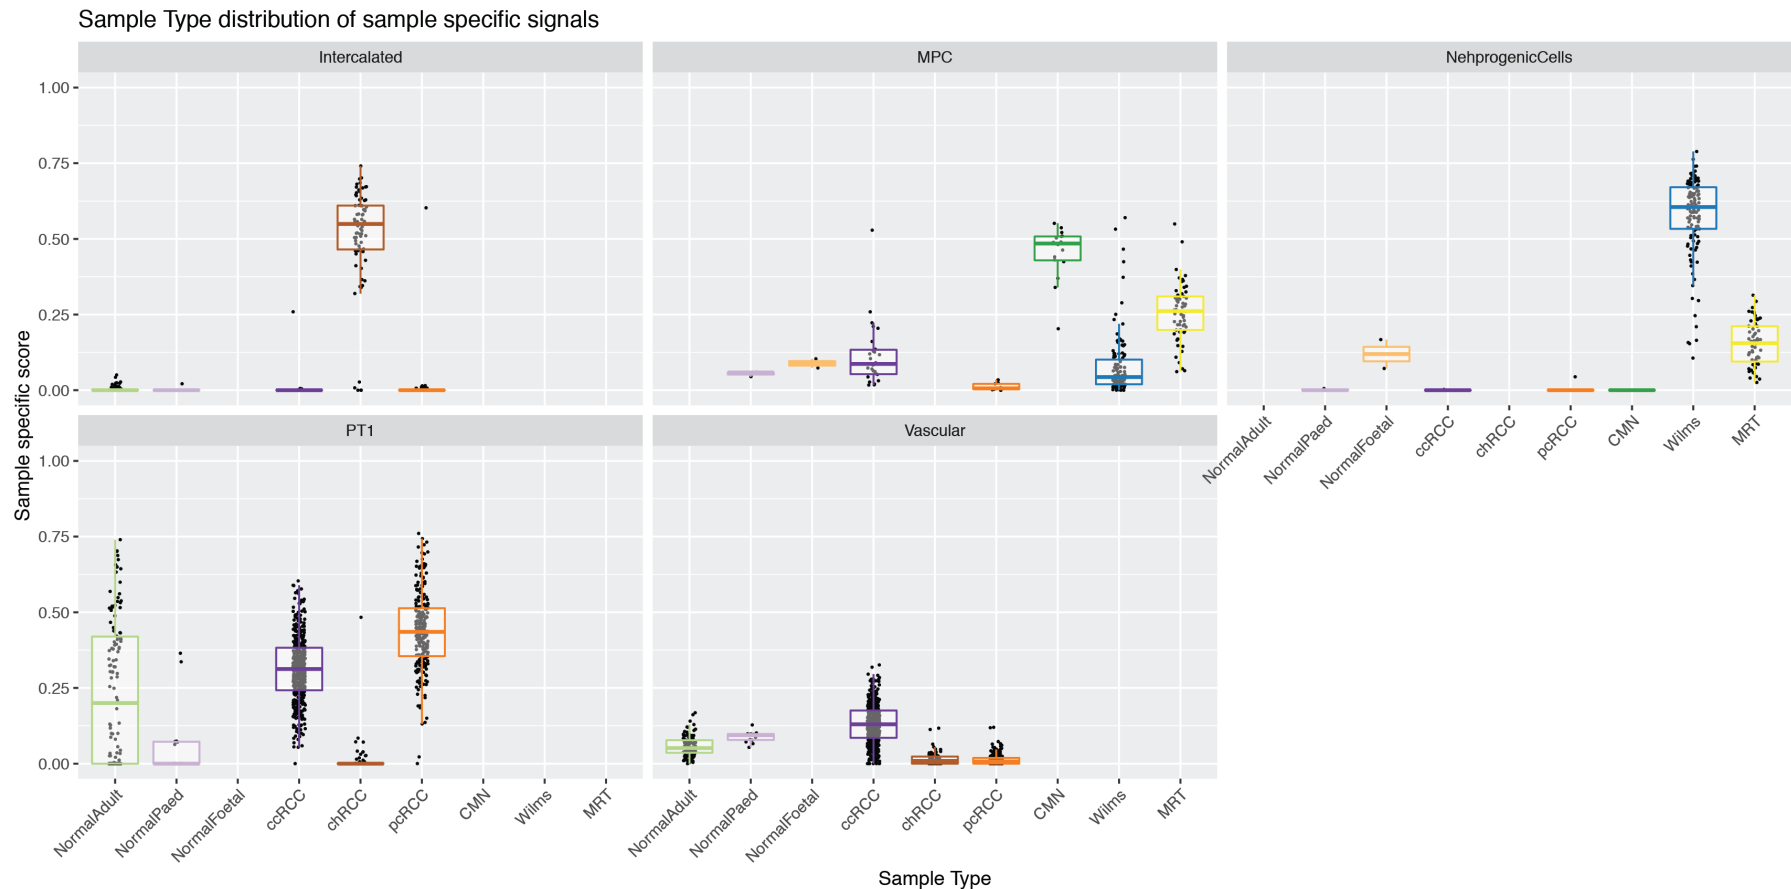

### Supplementary Figure 15 – Specificity of signal contributions to tumor types

Each panel shows the distribution of the contribution of different “scores” calculated by aggregating the contribution from various signals, across a range of different tumor and normal samples. Each point represents a sample, with its y-axis value giving its score, with the score type given by the panel. Samples are broken down by sample/tumor type as shown on the x-axis, with each sample type given a different color. Box-plots show the distribution of the scores within each sample type. This is a more detailed version of the data shown in **Fig. 7B**. Boxplots show the distribution median (middle line), 1<sup>st</sup> and 3<sup>rd</sup> quartiles (box limits), and 1.5 times the inter-quartile range beyond the box-limits (whiskers).

Source data are available as a Source Data file.

TARGET.50.PAJLUJ.06A

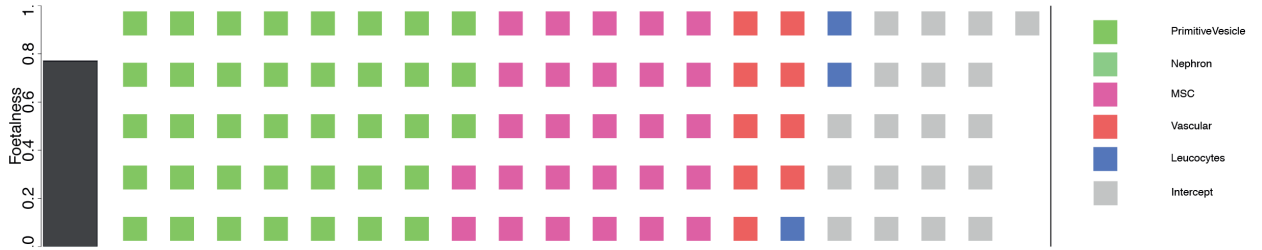

TARGET.50.PAJNGH.02A

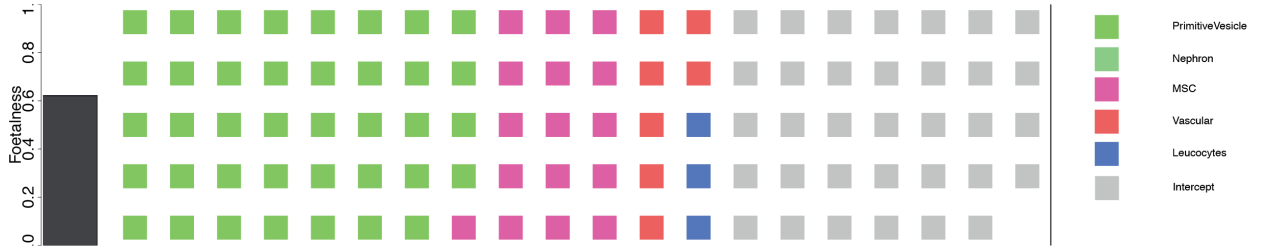

TARGET.50.PAJNTJ.02A

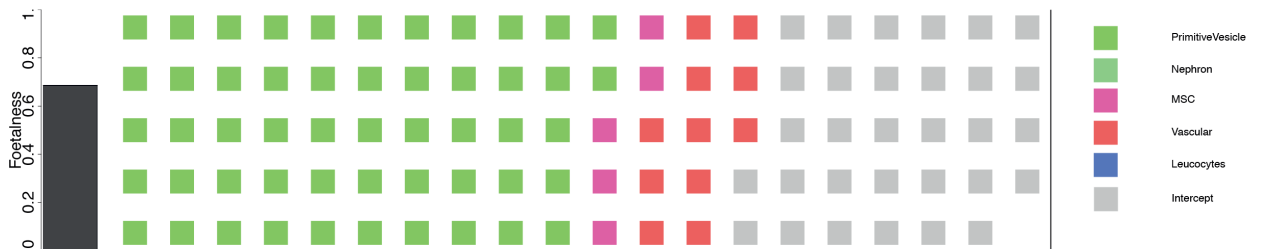

TARGET.50.PAJPDC.02A

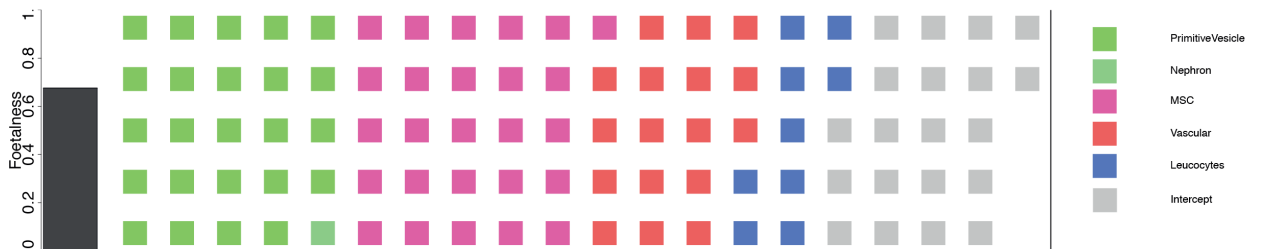

TARGET.50.PALFME.02A

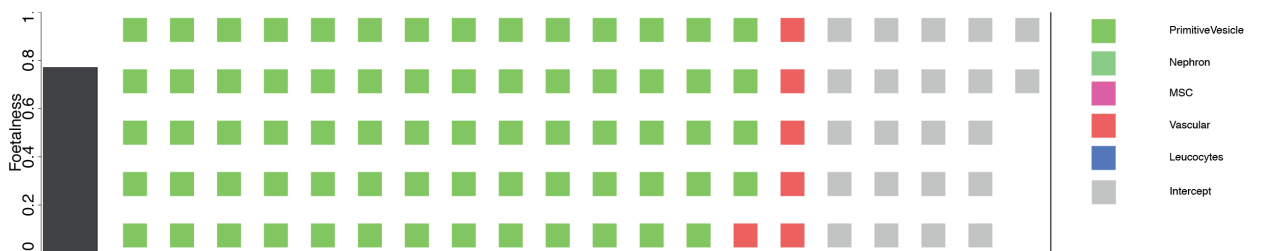

TARGET.50.PALJIP.02A

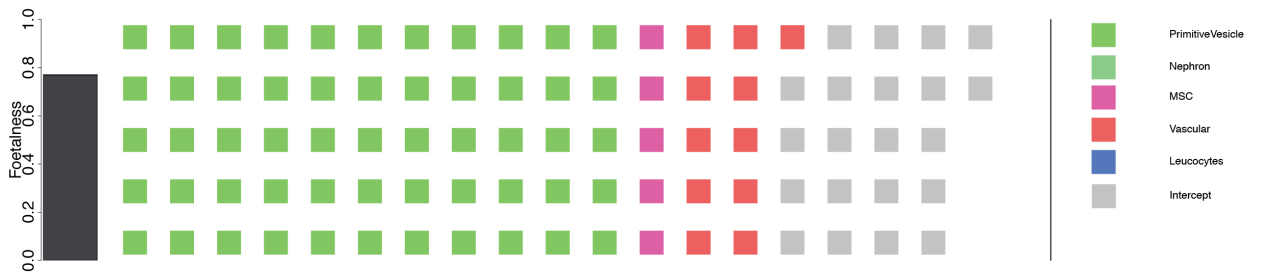

**Supplementary Figure 16 – Additional validation of tumor type inference**

The fetalness score and cell signal contribution for 6 non-primary Wilms tumors calculated as in **Fig. 7D-G**. The contribution from each cell signal to each bulk transcriptome was multiplied by 100 and rounded down to the nearest integer, which then determined the number of squares shown for each sample. The type of signal each square represents is indicated by the legend on the right.

Source data are available as a Source Data file.

**Ploidy: 2.88, aberrant cell fraction: 75%, goodness of fit: 99.6%**

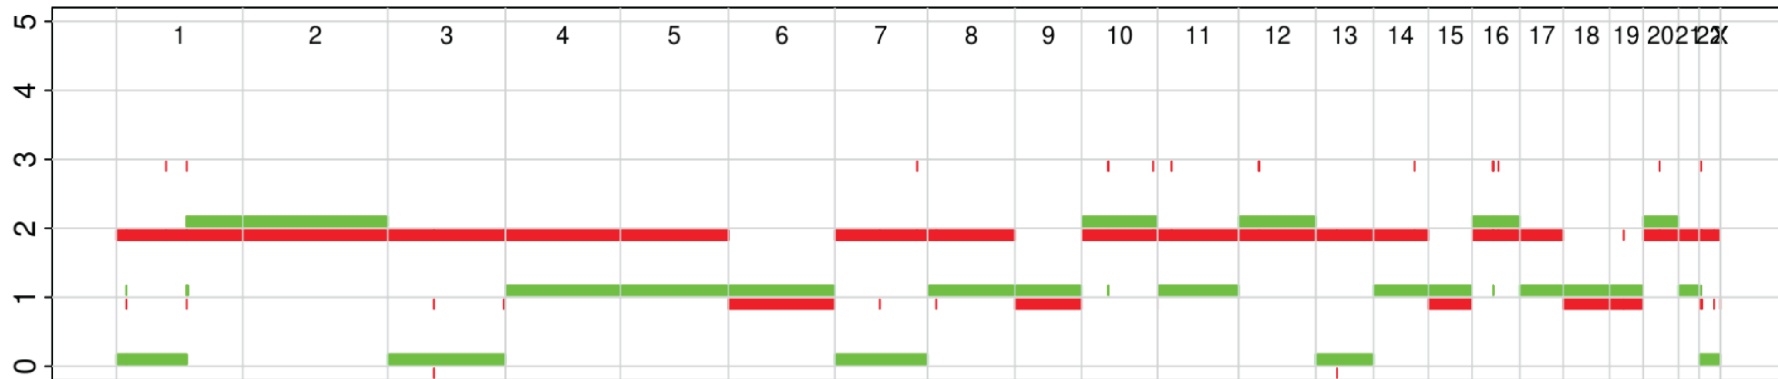

**Supplementary Figure 17 – CN profile of unknown childhood renal tumor**

Copy number profile of the unknown childhood renal tumor (SangerProject1700\_PR40309a). The colored lines represent the major (red) and minor (green) alleles copy number (y-axis) along the chromosomes as shown at the top of the plot.

# Colour scheme for cellular signals

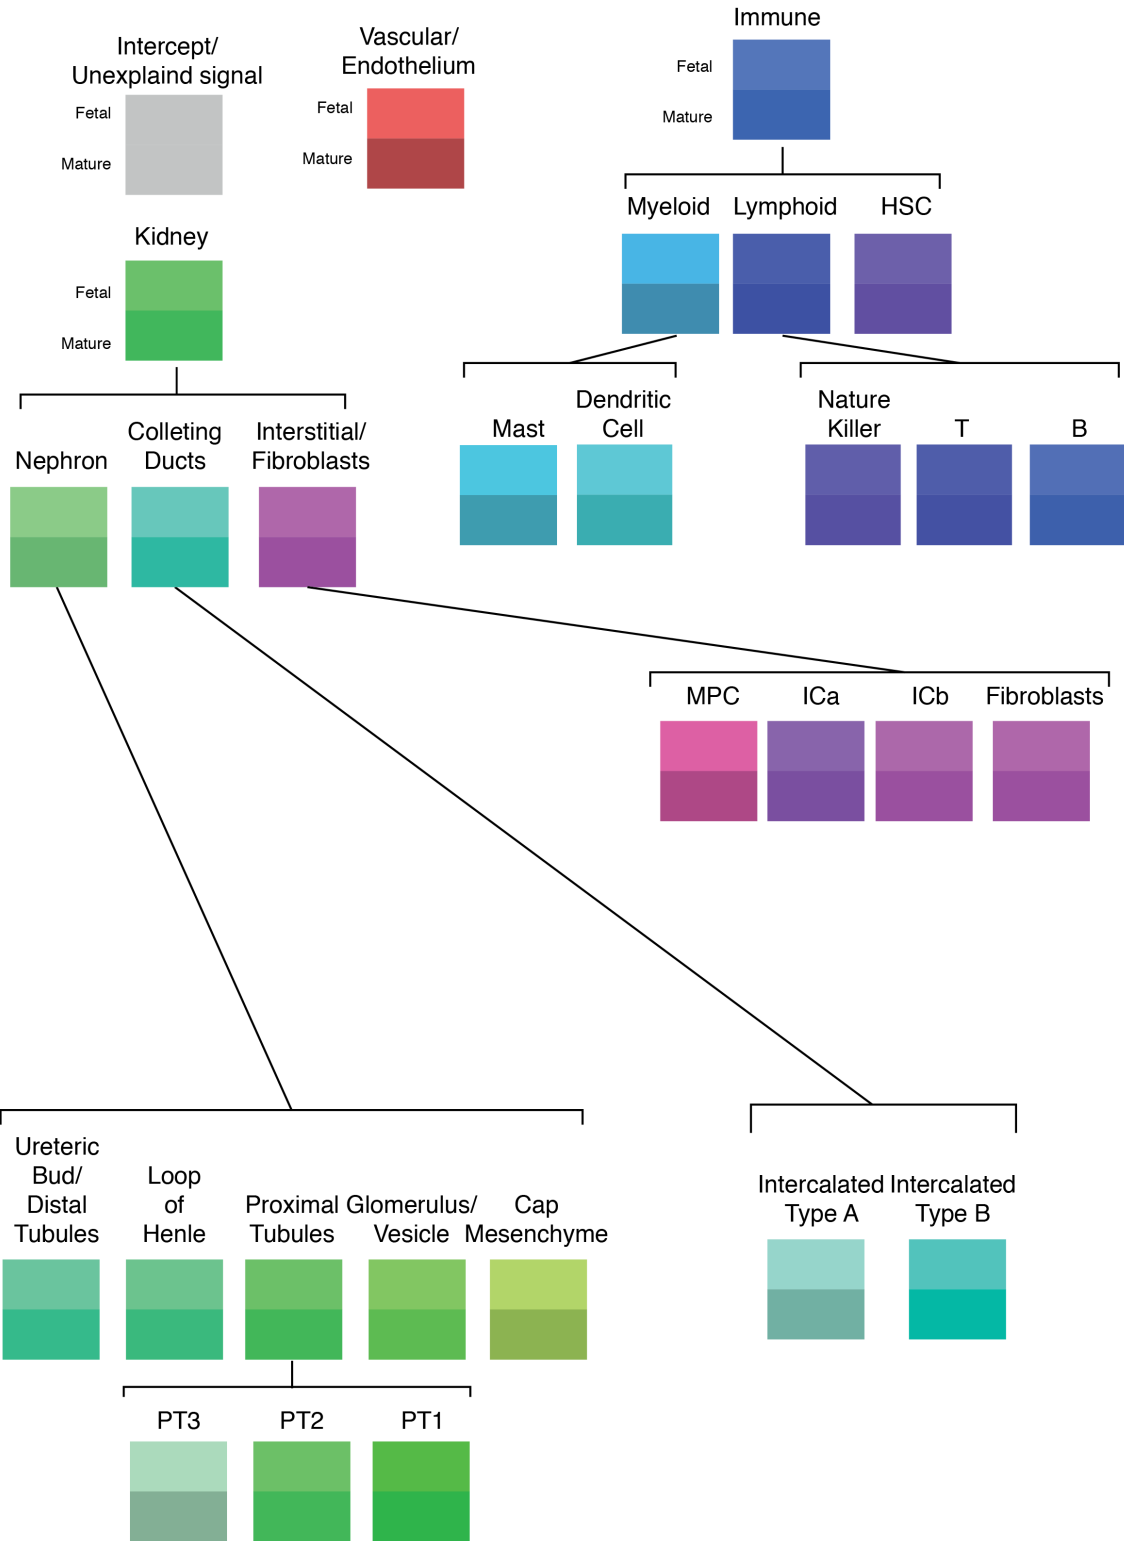

### **Supplementary Figure 18 – Color scheme for cell types**

Overview of the color scheme used throughout the figures in this paper to represent different cell types. Cell types are organized hierarchically, with fetal/mature versions of the same cell type represented by colors of the same hue and saturation but different value. The exception to this rule is the unexplained signal color which is the same in both a fetal and mature context.

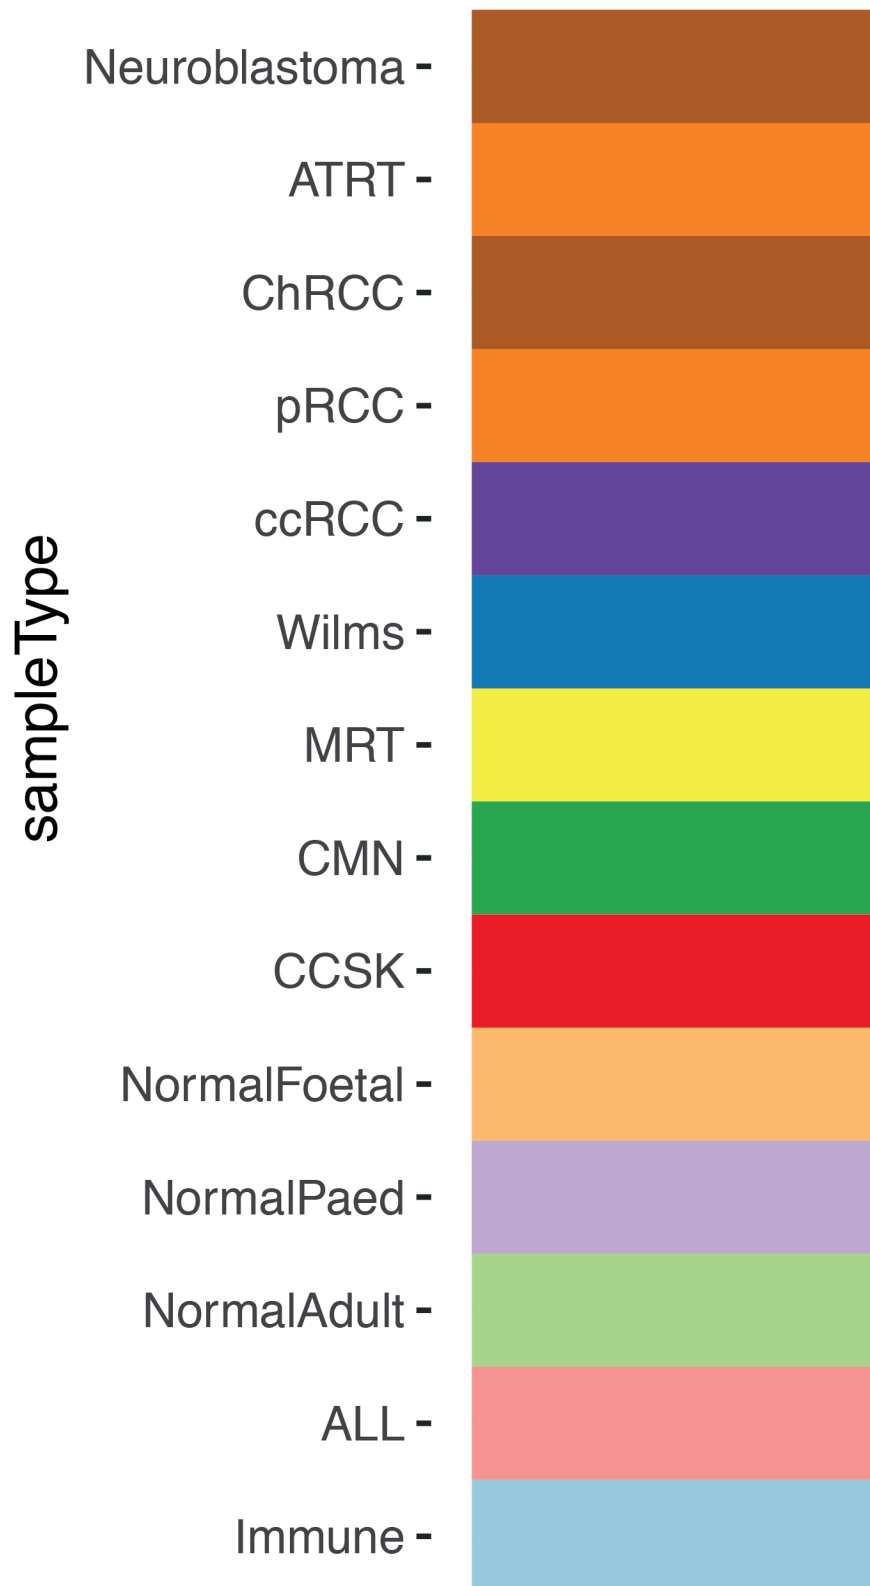

**Supplementary Figure 19 – Color scheme for sample types**

Overview of the color scheme used throughout the figures in this paper to represent different sample types. Where colors have been duplicated they either never occur in the same context, or it is obvious from the context which color refers to which sample type.

| channelLabel    | patientLabel | sampleType     | disease | age      | sort  | dataSource                        | assay  |
|-----------------|--------------|----------------|---------|----------|-------|-----------------------------------|--------|
| 4834STDY7002873 | Foetus15     | Normal         | Normal  | 12 PCW   | CD45+ | DOI: 10.1126/science.aat1699      | 10X 3' |
| 4834STDY7002874 | Foetus15     | Normal         | Normal  | 12 PCW   | CD45- | DOI: 10.1126/science.aat1699      | 10X 3' |
| 4834STDY7002875 | Foetus16     | Normal         | Normal  | 8+1 PCW  | CD45+ | DOI: 10.1126/science.aat1699      | 10X 3' |
| 4834STDY7002876 | Foetus16     | Normal         | Normal  | 8+1 PCW  | CD45- | DOI: 10.1126/science.aat1699      | 10X 3' |
| 4834STDY7002881 | Foetus17     | Normal         | Normal  | 9+1 PCW  | None  | DOI: 10.1126/science.aat1699      | 10X 3' |
| 4834STDY7002885 | Foetus17     | Normal         | Normal  | 9+1 PCW  | CD45+ | DOI: 10.1126/science.aat1699      | 10X 3' |
| 4834STDY7002886 | Foetus17     | Normal         | Normal  | 9+1 PCW  | CD45- | DOI: 10.1126/science.aat1699      | 10X 3' |
| FCAImmP7462242  | Foetus35     | Normal         | Normal  | 7+6 PCW  | CD45+ | DOI: 10.1126/science.aat5031      | 10X 3' |
| FCAImmP7462243  | Foetus35     | Normal         | Normal  | 7+6 PCW  | CD45- | DOI: 10.1126/science.aat5031      | 10X 3' |
| FCAImmP7528292  | Foetus38     | Normal         | Normal  | 13+6 PCW | CD45+ | DOI: 10.1126/science.aat5031      | 10X 3' |
| FCAImmP7528293  | Foetus38     | Normal         | Normal  | 13+6 PCW | CD45- | DOI: 10.1126/science.aat5031      | 10X 3' |
| FCAImmP7555849  | Foetus41     | Normal         | Normal  | 16+6 PCW | CD45+ | DOI: 10.1126/science.aat5031      | 10X 3' |
| FCAImmP7555850  | Foetus41     | Normal         | Normal  | 16+6 PCW | CD45- | DOI: 10.1126/science.aat5031      | 10X 3' |
| FCAImmP7579214  | Foetus45     | Normal         | Normal  | 13+6 PCW | CD45+ | DOI: 10.1126/science.aat5031      | 10X 3' |
| FCAImmP7579215  | Foetus45     | Normal         | Normal  | 13+6 PCW | CD45- | DOI: 10.1126/science.aat5031      | 10X 3' |
| w09             | w09          | Normal         | Normal  | NA       | NA    | DOI: 10.1371/journal.pbio.3000152 | 10X 3' |
| w11             | w11          | Normal         | Normal  | NA       | NA    | DOI: 10.1371/journal.pbio.3000152 | 10X 3' |
| w13             | w13          | Normal         | Normal  | NA       | NA    | DOI: 10.1371/journal.pbio.3000152 | 10X 3' |
| w16             | w16          | Normal         | Normal  | NA       | NA    | DOI: 10.1371/journal.pbio.3000152 | 10X 3' |
| w18             | w18          | Normal         | Normal  | NA       | NA    | DOI: 10.1371/journal.pbio.3000152 | 10X 3' |
| 4602STDY7685338 | PD42187      | Tumour         | CMN     | NA       | None  | EGAS00001002325                   | 10X 3' |
| 4602STDY7685339 | PD42187      | Tumour         | CMN     | NA       | None  | EGAS00001002325                   | 10X 3' |
| 5640STDY7891141 | MRT1         | NormalOrganoid | MRT     | NA       | None  | EGAS00001003386                   | 10X 3' |
| 5640STDY7891142 | MRT1         | TumourOrganoid | MRT     | NA       | None  | EGAS00001003386                   | 10X 3' |
| NB8350521       | PD48777      | Tumour         | Wilms   | NA       | None  | EGAD00001007572                   | 10X 3' |
| NB8350522       | PD48777      | Tumour         | Wilms   | NA       | CD45- | EGAD00001007572                   | 10X 3' |



|           |         |        |       |    |       |                 |               |
|-----------|---------|--------|-------|----|-------|-----------------|---------------|
| NB8350523 | PD48777 | Tumour | Wilms | NA | CD45- | EGAD00001007572 | 10X 3'        |
| NB8368876 | PD48777 | Tumour | Wilms | NA | None  | EGAD00001007572 | 10X 3'        |
| NB8368877 | PD48777 | Tumour | Wilms | NA | CD45- | EGAD00001007572 | 10X 3'        |
| NB8711738 | CCSK1   | Tumour | CCSK  | NA | NA    | EGAD00001007572 | Nuclei 10X 3' |
| NB8711739 | CCSK1   | Tumour | CCSK  | NA | NA    | EGAD00001007572 | Nuclei 10X 3' |
| NB8711740 | CCSK2   | Tumour | CCSK  | NA | NA    | EGAD00001007572 | Nuclei 10X 3' |
| NB8711741 | CCSK2   | Tumour | CCSK  | NA | NA    | EGAD00001007572 | Nuclei 10X 3' |
| NB8711742 | CCSK3   | Tumour | CCSK  | NA | NA    | EGAD00001007572 | Nuclei 10X 3' |
| TM211     | 1015T1  | Tumour | CCSK  | NA | NA    | EGAD00001007498 | CEL-Seq2      |
| TM212     | 1015T1  | Tumour | CCSK  | NA | NA    | EGAD00001007498 | CEL-Seq2      |
| NB8350518 | PD47704 | Tumour | MRT   | NA | None  | EGAD00001007572 | 10X 3'        |
| NB8350519 | PD47704 | Tumour | MRT   | NA | CD45- | EGAD00001007572 | 10X 3'        |
| NB8350520 | PD47704 | Tumour | MRT   | NA | CD45- | EGAD00001007572 | 10X 3'        |
| NB8368300 | PD47704 | Tumour | MRT   | NA | None  | EGAD00001007572 | 10X 3'        |
| NB8368301 | PD47704 | Tumour | MRT   | NA | CD45- | EGAD00001007572 | 10X 3'        |
| NB8711736 | MRT3    | Tumour | MRT   | NA | NA    | EGAD00001007572 | Nuclei 10X 3' |
| NB8711737 | MRT3    | Tumour | MRT   | NA | NA    | EGAD00001007572 | Nuclei 10X 3' |

### Supplementary Table 1 – Single cell manifest

A table giving a description of each single cell experiment included in this study. In the age column, PCW stands for post conception weeks. For each row, the raw count data is available in **Supplementary Data 3** in a folder with name given by the “channelLabel” column.

| <b>coefficient</b>      | <b>Estimate</b> | <b>Std. Error</b> | <b>t value</b> | <b>Pr(&gt; t )</b> | <b>qVal</b> |
|-------------------------|-----------------|-------------------|----------------|--------------------|-------------|
| (Intercept)             | 0.043420795     | 0.007086455       | 6.127293879    | 1.34E-09           | 1.05E-08    |
| splitccRCC              | 0.097857036     | 0.007328719       | 13.35254347    | 3.22E-37           | 1.16E-35    |
| splitpRCC CIMP          | 0.142529785     | 0.023561658       | 6.049225545    | 2.14E-09           | 1.28E-08    |
| splitpRCC T1            | 0.108900758     | 0.008940814       | 12.1801836     | 1.09E-31           | 1.97E-30    |
| splitpRCC T2            | 0.0410931       | 0.010917653       | 3.763913481    | 0.00017818         | 0.000916353 |
| splitpRCC Unc           | 0.085075024     | 0.0139183         | 6.112458078    | 1.46E-09           | 1.05E-08    |
| splitchRCC              | -0.016045051    | 0.010752786       | -1.492176164   | 0.13600536         | 0.30601206  |
| splitchRCC MD           | 0.271093348     | 0.041082107       | 6.598818053    | 7.09E-11           | 8.51E-10    |
| hitTypeTP53singleHit    | 0.021047117     | 0.011677218       | 1.802408447    | 0.0718175          | 0.215452499 |
| hitTypeTP53doubleHit    | 0.000687359     | 0.021635183       | 0.031770449    | 0.974662196        | 0.974662196 |
| hitTypeBAP1singleHit    | -0.013486051    | 0.008870115       | -1.520391994   | 0.128765671        | 0.30601206  |
| hitTypeBAP1doubleHit    | -0.069745425    | 0.049447887       | -1.410483414   | 0.158744444        | 0.317488888 |
| hitTypeCDKN2AsingleHit  | 0.024653553     | 0.025087408       | 0.982706237    | 0.32601761         | 0.510288433 |
| hitTypeVHLsingleHit     | 0.006883926     | 0.006049754       | 1.137885346    | 0.255472876        | 0.459851177 |
| hitTypeVHLdoubleHit     | -0.007308534    | 0.019379223       | -0.377132486   | 0.706164553        | 0.85176515  |
| hitTypePBRM1singleHit   | 0.002144084     | 0.006294524       | 0.340626871    | 0.733464435        | 0.85176515  |
| hitTypePBRM1doubleHit   | -0.006196931    | 0.029184362       | -0.212337396   | 0.831892171        | 0.907518732 |
| hitTypeSETD2singleHit   | 0.016482962     | 0.008195675       | 2.011178013    | 0.044606071        | 0.145983506 |
| hitTypeSETD2doubleHit   | -0.008720474    | 0.025086187       | -0.347620563   | 0.728206894        | 0.85176515  |
| hitTypeKDM5CsingleHit   | -0.015657612    | 0.011737054       | -1.334032499   | 0.182532552        | 0.345851151 |
| hitTypeKDM5CdoubleHit   | 0.103279661     | 0.050626133       | 2.040046403    | 0.04163883         | 0.145983506 |
| hitTypePTENsingleHit    | 0.009161375     | 0.011702299       | 0.782869655    | 0.43391075         | 0.650866126 |
| hitTypePTENdoubleHit    | 0.136496255     | 0.040337911       | 3.38382063     | 0.000745889        | 0.003356502 |
| hitTypeMTORsingleHit    | -0.007429789    | 0.011244737       | -0.66073476    | 0.508952457        | 0.732891538 |
| hitTypeMTORdoubleHit    | 0.023895949     | 0.049156597       | 0.486118856    | 0.627001896        | 0.806145295 |
| hitTypePIK3CAsingleHit  | -0.017528165    | 0.016367274       | -1.070927538   | 0.284490719        | 0.487698376 |
| hitTypePIK3CAdoubleHit  | -0.119272346    | 0.071174849       | -1.675765351   | 0.094133438        | 0.260677213 |
| hitTypeMETsingleHit     | 0.013717814     | 0.013809371       | 0.993369928    | 0.320798196        | 0.510288433 |
| hitTypeMETdoubleHit     | 0.010675768     | 0.049227288       | 0.216866867    | 0.828361523        | 0.907518732 |
| hitTypeFAT1singleHit    | 0.000809979     | 0.012684051       | 0.063858047    | 0.949097517        | 0.974662196 |
| hitTypeNF2singleHit     | 0.036993869     | 0.017774285       | 2.081313973    | 0.037688938        | 0.145983506 |
| hitTypeKDM6AsingleHit   | -0.030125498    | 0.019992242       | -1.506859435   | 0.132199554        | 0.30601206  |
| hitTypeKDM6AdoubleHit   | -0.003423503    | 0.050729383       | -0.067485599   | 0.946210199        | 0.974662196 |
| hitTypeSMARCB1singleHit | -0.028075701    | 0.019652678       | -1.428594183   | 0.153469791        | 0.317488888 |
| hitTypeNFE2L2singleHit  | -0.009935681    | 0.018581713       | -0.534702086   | 0.592988685        | 0.790651579 |
| hitTypeSTAG2singleHit   | -0.009271449    | 0.016090918       | -0.576191427   | 0.564630661        | 0.7817963   |

**Supplementary Table 2 – Linear model of immaturity by genotype**

Generated using “summary(fit)” in R, where fit is a linear model to predict the immaturity score of RCCs using sample genotype as covariates. Covariates are coded such that the intercept term corresponds to the wild type of non-tumor biopsy.

| <b>coefficient</b> | <b>Estimate</b> | <b>Std. Error</b> | <b>t value</b> | <b>Pr(&gt; t )</b> | <b>qVal</b> |
|--------------------|-----------------|-------------------|----------------|--------------------|-------------|
| (Intercept)        | 0.163510869     | 0.018861217       | 8.669158019    | 6.91E-17           | 1.11E-15    |
| mRNA1              | 0.023556367     | 0.010863869       | 2.168322037    | 0.030629906        | 0.08167975  |
| mRNA2              | 0.001214761     | 0.011694473       | 0.103874825    | 0.917312529        | 0.993826308 |
| mRNA3              | 0.061739964     | 0.011961718       | 5.161463027    | 3.61E-07           | 2.89E-06    |
| mRNA4              | -0.028420201    | 0.01216071        | -2.3370511     | 0.019851151        | 0.068526977 |
| miRNA1             | 0.033287926     | 0.01161994        | 2.864724376    | 0.004358656        | 0.023246165 |
| miRNA2             | -0.008154287    | 0.011496292       | -0.709297152   | 0.478488096        | 0.695982686 |
| miRNA3             | -0.010115854    | 0.010740307       | -0.941858989   | 0.346743598        | 0.554789757 |
| miRNA4             | 0.015538685     | 0.011823078       | 1.314267285    | 0.18939056         | 0.336694329 |
| gradeG2            | -0.025578429    | 0.019110589       | -1.33844272    | 0.181392447        | 0.336694329 |
| gradeG3            | -0.044934636    | 0.019467088       | -2.308236131   | 0.02141468         | 0.068526977 |
| gradeG4            | -0.042089242    | 0.021361856       | -1.970298941   | 0.049384495        | 0.112878847 |
| gradeGX            | -0.001147628    | 0.066465078       | -0.017266634   | 0.986231154        | 0.993826308 |
| stageStage II      | 0.000917833     | 0.010061156       | 0.091225427    | 0.927351929        | 0.993826308 |
| stageStage III     | -9.37E-05       | 0.007659532       | -0.012228755   | 0.990248243        | 0.993826308 |
| stageStage IV      | 7.37E-05        | 0.009513506       | 0.007741727    | 0.993826308        | 0.993826308 |

**Supplementary Table 3 – Linear model of immaturity by other features**

Generated using “summary(fit)” in R, where fit is a linear model to predict the immaturity score of ccRCCs using sample genotype as covariates. Covariates are coded such that the intercept term corresponds to unknown mRNA group, unknown miRNA group, grade G1, and stage I.

| <b>tType</b> | <b>nCells</b> | <b>nMast</b> | <b>mastFrac</b> |
|--------------|---------------|--------------|-----------------|
| pRCC2        | 1215037       | 8598         | 0.007076328     |
| ccRCC        | 645654        | 48862        | 0.075678304     |
| pRCC1        | 686715        | 57156        | 0.083231035     |

**Supplementary Table 4 – Mast cell fraction for RCCs**

Quantification of mast cell prevalence from smFISH of different tumors. In the column “tType” pRCC1/2 represents papillary cell renal cell carcinoma type 1/2.

| <b>ID</b> | <b>Disease</b> | <b>Assay</b>              |
|-----------|----------------|---------------------------|
| PD42187   | CMN            | SingleCellTranscriptomics |
| MRT1      | MRT            | SingleCellTranscriptomics |
| PD48777   | Wilms          | SingleCellTranscriptomics |
| CCSK1     | CCSK           | SingleCellTranscriptomics |
| CCSK2     | CCSK           | SingleCellTranscriptomics |
| CCSK3     | CCSK           | SingleCellTranscriptomics |
| 1015T1    | CCSK           | SingleCellTranscriptomics |
| PD47704   | MRT            | SingleCellTranscriptomics |
| MRT3      | MRT            | SingleCellTranscriptomics |
| PR36165   | Wilms          | BulkTranscriptomics       |
| PR37104   | ccRCC          | BulkTranscriptomics       |
| PR37228   | ccRCC          | BulkTranscriptomics       |
| PR37272   | Wilms          | BulkTranscriptomics       |
| PR37276   | Wilms          | BulkTranscriptomics       |
| PR40710   | Wilms          | BulkTranscriptomics       |
| PR40712   | Wilms          | BulkTranscriptomics       |
| PR40713   | Wilms          | BulkTranscriptomics       |
| PR40715   | Wilms          | BulkTranscriptomics       |
| PR40716   | Wilms          | BulkTranscriptomics       |
| PR40717   | Wilms          | BulkTranscriptomics       |
| PR40718   | Wilms          | BulkTranscriptomics       |
| PR40719   | Wilms          | BulkTranscriptomics       |
| PR40720   | Wilms          | BulkTranscriptomics       |
| PR40722   | Wilms          | BulkTranscriptomics       |
| PR40726   | Wilms          | BulkTranscriptomics       |
| PR40727   | Wilms          | BulkTranscriptomics       |
| PR40728   | Wilms          | BulkTranscriptomics       |
| PR40729   | Wilms          | BulkTranscriptomics       |
| PR37201   | CMN            | BulkTranscriptomics       |
| PR37205   | CMN            | BulkTranscriptomics       |
| PR37217   | CMN            | BulkTranscriptomics       |
| PR37220   | CMN            | BulkTranscriptomics       |
| PR37223   | CMN            | BulkTranscriptomics       |
| PR37199   | CMN            | BulkTranscriptomics       |
| PR37200   | CMN            | BulkTranscriptomics       |
| PR37204   | CMN            | BulkTranscriptomics       |
| PR37208   | CMN            | BulkTranscriptomics       |
| PR37212   | CMN            | BulkTranscriptomics       |
| PR37213   | CMN            | BulkTranscriptomics       |

|         |                   |                     |
|---------|-------------------|---------------------|
| PR37214 | CMN               | BulkTranscriptomics |
| PR37216 | CMN               | BulkTranscriptomics |
| PR37219 | CMN               | BulkTranscriptomics |
| PR37221 | CMN               | BulkTranscriptomics |
| PR37222 | CMN               | BulkTranscriptomics |
| PR37224 | CMN               | BulkTranscriptomics |
| PR37210 | CMN               | BulkTranscriptomics |
| PR37225 | CMN               | BulkTranscriptomics |
| PR37202 | CMN               | BulkTranscriptomics |
| PR40309 | CrypticRenalTumor | BulkTranscriptomics |

**Supplementary Table 5 – Patient samples**

A list of all the patient samples used in this study, giving disease type and assay performed.

## Supplementary References

1. Hochane, M. *et al.* Single-cell transcriptomics reveals gene expression dynamics of human fetal kidney development. *PLoS Biol.* **17**, (2019).
